# Supplementary material for: CD4+CD8+ T follicular helper cells regulate humoral immunity in chronic inflammatory lesions
Source: Front Immunol. 2022 Aug 25;13:941385. doi: 10.3389/fimmu.2022.941385 (PMC9452889; doi:10.3389/fimmu.2022.941385)
Supplement: Supplementary Table 5 — Differentially expressed genes between Tfh cells in IgG4-RD lesions and Tfh cells in tonsils assessed by microarray analysis. [file Table_5.xlsx]

## Sheet: Sheet1
	Supplementary Table S5.
	Transcriptome analysis of GC-Tfh cells in IgG4-RD lesions and tonsils.
	The 4152 genes were selected on the basis of the differential expression with more than twofold (p < 0.05) between GC-Tfh cells of IgG4-RD lesions and GC-Tfh cells of tonsils.
	Gene Symbol	log2 (fold change) Disease/Control	p value	-log10 (p value)
	CBLN2	6.81883	0.00612874	2.21263
	CD8A	6.50533	0.0066276	2.17864
	LOC100130502	5.90008	0.00227856	2.64234
	RGS4	5.89236	0.00177769	2.75014
	ALOX5	5.77554	0.000697	3.15677
	ENOX1	5.77458	0.000312	3.50585
	IGFL2	5.73127	0.00016	3.79588
	MAP2	5.67583	0.00373721	2.42745
	KCNJ6	5.60425	0.000568	3.24565
	CDH18	5.4422	0.00692558	2.15954
	LIMCH1	5.35733	0.00112795	2.94771
	LINC00607	5.21836	4.89e-05	4.31069
	NR5A2	5.01213	0.000113	3.94692
	KCNJ2	4.97445	0.0201409	1.69592
	LPL	4.77476	0.013821	1.85946
	NEBL	4.77371	0.00210718	2.6763
	SLCO5A1	4.7208	0.00131132	2.88229
	GZMK	4.64514	0.00781875	2.10686
	TIMP4	4.64371	0.00617548	2.20933
	IRX3	4.61486	0.000228	3.64207
	CCL3L3	4.51717	0.00436908	2.35961
	ASB4	4.32699	0.00164426	2.78403
	CCR2	4.28437	0.00264772	2.57713
	KIF26B	4.28397	0.00146953	2.83282
	EOMES	4.25888	0.00541394	2.26649
	SERPINE2	4.25812	0.00066	3.18046
	BEGAIN	4.21547	0.00288335	2.5401
	PROC	4.14411	0.000452	3.34486
	GNB4	4.11862	0.00868854	2.06105
	NKX2-2	4.06721	0.00375275	2.42565
	CCL3	4.0388	0.00605262	2.21806
	LOC101929759	3.99925	0.000149	3.82681
	TRIM58	3.96414	0.0163935	1.78533
	MEST	3.96293	0.00271862	2.56565
	INSR	3.94261	8.22e-05	4.08513
	HSD11B1	3.94059	0.00115374	2.93789
	LOC101930246	3.877	0.0108248	1.96558
	ACSBG1	3.84649	9.66e-05	4.01502
	FGF13	3.81358	0.00260004	2.58502
	SLAMF7	3.77963	0.00983325	2.0073
	MITF	3.70772	0.0133336	1.87505
	HTR2A-AS1	3.64946	0.00137451	2.86185
	RASGEF1A	3.63308	0.00772276	2.11223
	HTR2A	3.60746	0.00447402	2.3493
	CCL4L2	3.60221	0.00657493	2.18211
	ZNF423	3.59877	0.0147081	1.83244
	DIRAS2	3.57952	0.0041202	2.38508
	CDO1	3.55339	0.00273737	2.56267
	FAIM2	3.5306	0.00268739	2.57067
	FGD4	3.51974	0.000317	3.49894
	MYOF	3.51851	0.00271918	2.56556
	PRSS1	3.49503	0.00032	3.49485
	FAM20A	3.45704	0.00875656	2.05767
	TMEM155	3.45501	0.010754	1.96843
	CD70	3.42264	0.00443254	2.35335
	HAAO	3.41837	0.00165212	2.78196
	LOC101060810	3.40843	0.0463408	1.33404
	LINC01033	3.40761	0.0240905	1.61815
	CAV1	3.37878	0.00261424	2.58266
	GPR56	3.37496	0.0170944	1.76715
	PCDH20	3.34604	0.00196186	2.70733
	RDH10	3.34222	0.00206156	2.6858
	LCT	3.32811	0.000352	3.45346
	PRDM16	3.32761	0.0176977	1.75208
	PRSS23	3.30645	0.0138159	1.85962
	CRTAM	3.28521	0.00229429	2.63935
	MYOD1	3.28204	0.0086248	2.06425
	MUCL1	3.27271	0.00241242	2.61755
	ARNT2	3.26293	0.000726	3.13906
	PAX9	3.25399	0.0382086	1.41784
	CDK14	3.24645	0.00870492	2.06024
	SALL4	3.24357	0.00391557	2.4072
	NOG	3.20983	0.00503032	2.2984
	FHIT	3.20655	0.00119049	2.92427
	SH3BGRL2	3.18041	0.00521293	2.28292
	RTP1	3.17823	0.00583074	2.23428
	CD80	3.17607	0.00104936	2.97908
	SLC16A14	3.17416	0.0111571	1.95245
	FFAR3	3.1495	0.000873	3.05899
	PDE8B	3.14887	0.000672	3.17263
	LMCD1	3.14477	0.0032998	2.48151
	KIAA0226L	3.11648	0.0014837	2.82865
	LHX1	3.11333	0.000948	3.02319
	ME3	3.08419	0.00120732	2.91818
	PIP5K1B	3.07278	0.00413518	2.38351
	PP12613	3.03747	0.016875	1.77276
	PROKR2	3.03406	0.00250452	2.60128
	PTF1A	3.03313	0.0096548	2.01526
	ADAMTS3	3.02892	0.00178892	2.74741
	PRSS3P2	3.02603	0.00102484	2.98934
	KL	3.02369	0.000149	3.82681
	XCL1	3.01424	0.0320902	1.49363
	TCERG1L	3.01424	4.87e-05	4.31247
	CD8B	3.00226	0.00475778	2.3226
	MCF2	2.99737	0.00261228	2.58298
	FGFBP2	2.97531	0.02525	1.59774
	SPRY2	2.96238	0.0440451	1.3561
	LHFP	2.95504	1.51e-05	4.82102
	RTKN2	2.93152	0.00209172	2.6795
	ZBED2	2.91293	0.00769353	2.11387
	LOC100996405	2.89504	0.0150325	1.82297
	SGCE	2.88264	3.3e-05	4.48149
	CCL18	2.87894	0.0122974	1.91019
	NRP2	2.86786	0.0492084	1.30796
	HMSD	2.86523	0.00309982	2.50866
	NKG7	2.85699	0.0383576	1.41615
	CD24	2.83924	6.7e-05	4.17393
	FILIP1L	2.80704	0.000413	3.38405
	TNFSF9	2.78748	0.0147751	1.83047
	DFNB31	2.78528	0.00113534	2.94488
	SCUBE2	2.77922	0.00736903	2.13259
	COLCA2	2.77825	0.0103026	1.98705
	SLC35G2	2.77042	0.00715289	2.14552
	PPARG	2.76777	0.00228531	2.64105
	CCDC149	2.76018	3.54e-05	4.451
	DOCK1	2.75711	0.0304342	1.51664
	PDE7B	2.74826	0.000478	3.32057
	DNM3	2.7444	0.00269654	2.56919
	C4orf26	2.73344	0.021703	1.66348
	LIPC	2.72736	0.0132099	1.8791
	RASSF4	2.72195	0.00775848	2.11022
	COPG2IT1	2.70486	0.0107627	1.96808
	G0S2	2.66659	0.00302343	2.5195
	LOC102724332	2.66402	0.0124895	1.90345
	PRKCDBP	2.65847	0.000837	3.07727
	PMP22	2.65505	0.0416834	1.38004
	PECAM1	2.6514	0.00439478	2.35706
	STAT4	2.61881	0.000367	3.43533
	APOBEC3H	2.60568	0.0100877	1.99621
	TMEM136	2.60284	0.00272307	2.56494
	CTHRC1	2.60213	0.0466448	1.3312
	KIAA1217	2.59898	0.0126866	1.89665
	SATB2	2.59877	0.00147137	2.83228
	LINC01252	2.57576	1.81e-05	4.74232
	CX3CR1	2.55852	0.0162916	1.78803
	HLA-DRB5	2.55385	0.00221223	2.65517
	FLT1	2.55166	0.00452944	2.34396
	NRP1	2.54765	0.00108589	2.96421
	OXER1	2.53764	0.0111168	1.95402
	LINC01501	2.53583	0.00155791	2.80746
	BHLHE40-AS1	2.52342	0.000923	3.0348
	HECTD2	2.51171	0.00109006	2.96255
	ZNF365	2.50798	0.0310569	1.50784
	IFNG	2.49317	0.028397	1.54673
	ETV7	2.46938	0.00701823	2.15377
	CD109	2.46628	0.00765755	2.11591
	DFNA5	2.45859	0.00107803	2.96737
	NEDD4L	2.45569	0.000524	3.28067
	ZNF532	2.4472	0.00943769	2.02513
	LINC01540	2.44344	0.00277646	2.55651
	ZEB2	2.4366	0.00210702	2.67633
	LINC00312	2.43025	1.96e-06	5.70774
	SNTB1	2.42338	0.0198721	1.70176
	AKAP12	2.42319	0.0035507	2.44969
	LHX2	2.41569	0.0231006	1.63638
	NEBL-AS1	2.40938	0.0204241	1.68986
	STAU2	2.40646	0.005219	2.28241
	CRYBB1	2.40517	0.0115683	1.93673
	FXYD6	2.39967	0.0110527	1.95653
	TRGV7	2.39057	0.015152	1.81953
	GABRE	2.3901	0.00996165	2.00167
	BMPER	2.38308	0.0217428	1.66268
	REREP3	2.3661	0.00703665	2.15263
	PACSIN1	2.3527	0.0307599	1.51202
	RERE	2.34951	0.00751309	2.12418
	JAM2	2.34591	0.0158248	1.80066
	GEM	2.33964	0.00531423	2.27456
	ALPK2	2.33049	0.0154301	1.81163
	HLA-DOA	2.32891	0.017248	1.76326
	PMCH	2.32243	0.0396772	1.40146
	GLIS1	2.3098	0.0209011	1.67983
	HLA-DQA2	2.30909	0.0394095	1.4044
	ARHGAP44	2.29695	0.000708	3.14997
	KCNJ15	2.29244	0.00120334	2.91961
	MAMLD1	2.27316	0.000178	3.74958
	SLC24A3	2.27261	0.0370325	1.43142
	CHGB	2.25999	0.00065	3.18709
	NFIL3	2.25796	0.00210441	2.67687
	GNG4	2.25229	0.000701	3.15428
	APOC1	2.22736	0.00314211	2.50278
	HLA-DQB1	2.22121	0.0165655	1.78079
	TNFRSF10C	2.21589	0.0405367	1.39215
	MAP7	2.21265	0.000384	3.41567
	HLA-DQB2	2.21129	0.0326645	1.48592
	TNFSF11	2.21037	0.00091	3.04096
	HMOX1	2.20373	0.0244921	1.61097
	CIITA	2.17938	0.0270446	1.56792
	BAMBI	2.17715	0.0267057	1.5734
	TIAM2	2.17652	0.00081	3.09151
	GAB2	2.17468	0.000109	3.96257
	HLA-DRB4	2.17374	0.00547444	2.26166
	ANKRD20A2	2.17256	0.0307723	1.51184
	MSC	2.15674	0.0224027	1.6497
	DUSP4	2.15654	0.0020757	2.68283
	MS4A6A	2.15208	0.0150996	1.82103
	HP09025	2.15078	0.00408529	2.38878
	STARD13	2.14933	0.000289	3.5391
	MAP6D1	2.13516	0.0119381	1.92307
	BEND4	2.1272	0.0212275	1.6731
	RNF207	2.12711	6.68e-05	4.17522
	ANGPTL4	2.10645	0.00628584	2.20164
	AGAP1	2.10528	0.037358	1.42762
	CNKSR3	2.09847	0.000677	3.16941
	FOXD1	2.09502	0.0156213	1.80628
	AMIGO2	2.08653	0.000784	3.10568
	FBXO16	2.08508	0.00125401	2.9017
	FRY	2.08279	0.0123341	1.90889
	SNX7	2.07965	0.00606742	2.217
	INSM1	2.07729	0.0194042	1.71211
	THEM5	2.07485	0.0349548	1.45649
	LOC101927095	2.06531	0.0348896	1.4573
	KIAA0408	2.05837	0.0472235	1.32584
	ARHGEF12	2.0536	0.00170643	2.76791
	TPD52L1	2.05283	0.011609	1.9352
	SHC4	2.04601	0.0443496	1.35311
	HLA-DRB1	2.04277	0.0228276	1.64154
	TNAP	2.04107	0.00402141	2.39562
	HSPA12A	2.03842	0.00801296	2.09621
	FZD6	2.03467	0.0222691	1.6523
	PRB4	2.02706	0.0128195	1.89213
	NET1	2.02569	0.00516455	2.28697
	TNC	2.0145	0.0236848	1.62553
	PRH2	2.01066	0.0076132	2.11843
	HLA-DRA	1.99826	0.0486576	1.31285
	DGKH	1.98992	0.00100095	2.99959
	CCDC141	1.96978	0.037228	1.42913
	SEPP1	1.96959	0.00269953	2.56871
	RND2	1.96889	0.00889705	2.05075
	UBD	1.96614	0.00130617	2.884
	NR4A2	1.94829	0.00489194	2.31052
	WNT6	1.94746	0.0144192	1.84106
	S1PR3	1.943	0.0044062	2.35594
	ITPRIPL2	1.94158	7.65e-05	4.11634
	RTKN	1.93774	0.00844471	2.07342
	LOC101928489	1.9341	0.00754179	2.12253
	SLC16A4	1.92738	0.0066572	2.17671
	SIPA1L2	1.92321	0.00177765	2.75015
	PLA2G16	1.91967	0.000132	3.87943
	CD19	1.91246	0.0408934	1.38835
	LOC101927630	1.9103	0.00518315	2.28541
	ATP10A	1.90598	0.033854	1.47039
	NAP1L6	1.90126	0.00854914	2.06808
	FGF2	1.90116	0.00607421	2.21651
	SLC9A7	1.89983	0.000175	3.75696
	HTR4	1.89366	0.0373268	1.42798
	AEBP1	1.89242	0.0259307	1.58619
	TNFRSF9	1.89029	0.0179622	1.74564
	OR13A1	1.88844	0.00155798	2.80744
	TPM2	1.88841	0.0141094	1.85049
	NREP	1.88739	0.0328731	1.48316
	LRRC75B	1.88248	0.029585	1.52893
	ZNF404	1.87887	0.0210683	1.67637
	GSTA4	1.875	0.00268619	2.57086
	SLC29A1	1.87409	0.00275527	2.55984
	PHEX	1.86987	0.00836022	2.07778
	CYBRD1	1.86727	2.81e-05	4.55129
	BSPRY	1.86354	0.0153879	1.81282
	DHRS3	1.86186	0.0058571	2.23232
	HES7	1.85647	0.0080571	2.09382
	PHLPP1	1.841	3.51e-06	5.45469
	NUPR1	1.83534	0.00349231	2.45689
	KRT80	1.83401	0.0143718	1.84249
	TNFAIP8L3	1.83265	0.00306875	2.51304
	RGS1	1.83124	0.0268703	1.57073
	FZD5	1.82723	0.000941	3.02641
	BHLHE22	1.8189	0.0338906	1.46992
	UNQ6494	1.81838	0.0184382	1.73428
	KCNN3	1.80589	0.000102	3.9914
	PEG10	1.80363	0.00234214	2.63039
	HLA-DMB	1.80088	0.00896954	2.04723
	PRB1	1.79934	0.0196294	1.70709
	HLA-DRB3	1.79737	0.0265661	1.57567
	TARP	1.79547	0.00708378	2.14973
	COLCA1	1.79324	0.0377314	1.4233
	OSBPL10	1.79234	0.0221602	1.65443
	RGS2	1.78646	0.0089945	2.04602
	TWSG1	1.78435	0.00102609	2.98881
	PRR5L	1.78211	0.0276957	1.55759
	LOC101927975	1.77117	0.00875849	2.05757
	GLDC	1.76338	0.00338563	2.47036
	SAMD4A	1.75869	0.00367666	2.43455
	COL16A1	1.75824	0.018645	1.72944
	SRD5A1	1.75185	0.00246327	2.60849
	OOEP	1.75092	0.00577796	2.23823
	MIPEPP3	1.73693	0.039768	1.40047
	NMB	1.73639	0.0104247	1.98193
	SLC30A3	1.73335	0.0280173	1.55257
	VANGL2	1.73294	0.0102888	1.98764
	LGALS12	1.73241	0.0149935	1.8241
	NFE2L3	1.7282	0.000439	3.35754
	KAZALD1	1.72572	0.00408217	2.38911
	CAV3	1.7224	0.0322876	1.49096
	FGD6	1.72021	0.0355197	1.44953
	LOC101928045	1.70848	0.00666548	2.17617
	AP1S3	1.70539	0.00261317	2.58283
	KIF7	1.69721	0.00678853	2.16822
	IFT81	1.69437	0.000466	3.33161
	CDH1	1.68796	0.0419995	1.37676
	ZFHX3	1.68447	0.00954669	2.02015
	PCAT29	1.68391	0.0127995	1.89281
	COL9A2	1.67946	0.0380821	1.41928
	NOD2	1.67865	0.0111626	1.95224
	PLD1	1.67226	0.0496847	1.30378
	MIR143HG	1.66829	0.0320026	1.49481
	FZD3	1.66677	8.08e-05	4.09259
	CST5	1.65721	0.0103205	1.9863
	MB21D2	1.64406	0.00640842	2.19325
	LOC100288798	1.64352	0.0300469	1.5222
	RHOB	1.64266	0.0156319	1.80599
	KCNE2	1.637	0.00101493	2.99357
	EML1	1.62692	0.0218013	1.66152
	CCND1	1.62539	0.0038146	2.41855
	TCL1A	1.6217	0.0103893	1.98341
	TGM2	1.61535	0.0367734	1.43447
	C15orf27	1.61321	0.0249732	1.60253
	F7	1.60942	0.0332158	1.47866
	FAM92A1	1.60547	0.000516	3.28735
	ZC3H18-AS1	1.60126	0.0303936	1.51722
	SPR	1.59302	0.0370133	1.43164
	CD276	1.59215	0.0122028	1.91354
	SERP2	1.5859	0.00596559	2.22435
	PLEKHA7	1.58009	9.36e-05	4.02872
	CCR5	1.57866	0.0396468	1.40179
	PTHLH	1.5741	0.0254645	1.59407
	LOC100507600	1.57069	0.0108495	1.96459
	DSCAML1	1.56837	0.00479856	2.31889
	HORMAD2	1.56802	0.0185199	1.73236
	PADI4	1.56702	0.0493563	1.30666
	ALDH7A1	1.55926	0.0179392	1.7462
	GRIK4	1.55678	0.0398542	1.39953
	PRRX2	1.5564	0.0158501	1.79997
	EPCAM	1.55559	0.0446091	1.35058
	SUPT3H	1.5555	0.0288002	1.5406
	JAG1	1.55439	0.0140443	1.8525
	NR4A3	1.55269	0.000199	3.70115
	FASLG	1.55086	0.00881292	2.05488
	LRRN1	1.54994	0.0261196	1.58303
	SGK1	1.54942	0.011554	1.93727
	PRR4	1.54249	0.00673576	2.17161
	UGGT2	1.53971	0.0194205	1.71174
	BHLHE40	1.53211	0.00101977	2.9915
	MAGI2	1.53142	0.000155	3.80967
	IGSF3	1.52785	0.0300714	1.52185
	PARD3	1.52621	0.00109008	2.96254
	MYO1E	1.52349	0.0414434	1.38255
	SLC40A1	1.52338	0.0132724	1.87705
	NR2F6	1.52127	0.0109015	1.96251
	IGLL5	1.52115	0.0386578	1.41276
	COL27A1	1.51916	0.0460385	1.33688
	LMNA	1.51568	0.00380809	2.41929
	HLA-DPA1	1.50647	0.00671475	2.17297
	WNT5B	1.5019	0.0147832	1.83023
	CMAHP	1.50149	3.54e-05	4.451
	CYP7B1	1.49375	0.0215661	1.66623
	TSC22D1	1.4925	0.000394	3.4045
	PNOC	1.49228	0.0235986	1.62711
	FAM63A	1.49137	0.0163749	1.78582
	GPT2	1.49002	0.0237472	1.62439
	ZBTB46	1.48848	0.000498	3.30277
	HVCN1	1.48772	0.00342948	2.46477
	GSC	1.48297	0.0291963	1.53467
	ZFAT	1.47586	0.00932939	2.03015
	SSH1	1.47523	0.0295987	1.52873
	SDC4	1.47413	0.00674718	2.17088
	ADAMTS12	1.47372	0.0419906	1.37685
	UBOX5-AS1	1.46928	0.0259461	1.58593
	OGN	1.46843	0.0121559	1.91521
	NCALD	1.46449	3.87e-05	4.41229
	PHLDA3	1.4643	0.00435216	2.3613
	OSBPL3	1.46197	0.000777	3.10958
	ATP9A	1.45328	0.0303165	1.51832
	LOC101927100	1.44135	0.00294144	2.53144
	PMAIP1	1.44131	0.00717687	2.14406
	IGJ	1.43477	0.0336088	1.47355
	DAPK2	1.43131	0.0121076	1.91694
	C1orf198	1.42801	0.000175	3.75696
	KLF2	1.42558	0.0263392	1.5794
	CST7	1.4175	0.0370199	1.43156
	ITGA4	1.41744	0.000939	3.02733
	FCRL5	1.41723	0.0488891	1.31079
	ABHD17C	1.41272	0.000555	3.25571
	ANK1	1.40987	0.0431972	1.36454
	GCNT2	1.40706	0.0339428	1.46925
	STXBP1	1.40623	0.0018212	2.73964
	PGPEP1L	1.40479	0.0254273	1.5947
	WNT1	1.40448	0.0305564	1.5149
	RPH3A	1.40127	0.0106616	1.97218
	LOC101928620	1.39905	0.0245197	1.61048
	LOC643454	1.39421	3.66e-06	5.43652
	C16orf93	1.39177	0.0286888	1.54229
	TTC39B	1.38889	0.000451	3.34582
	HLA-DMA	1.3855	0.00757234	2.12077
	CXCL14	1.38456	0.0251466	1.59952
	LOC100132078	1.3787	0.0456209	1.34084
	KTN1-AS1	1.37636	0.0268148	1.57163
	ZDHHC14	1.37302	0.0483699	1.31542
	EXTL2	1.34356	0.00520396	2.28367
	C2CD4C	1.3413	0.040724	1.39015
	FNDC3B	1.33563	0.00167923	2.77489
	TP53I3	1.33527	0.049659	1.304
	ARMC9	1.33449	0.00593674	2.22645
	C11orf96	1.33238	0.01898	1.7217
	AP3S1	1.3291	3.08e-06	5.51145
	SMAD9	1.3225	0.0296703	1.52768
	HLA-DPB1	1.3087	0.0281497	1.55053
	DNAJC18	1.30818	0.0132647	1.8773
	OR8J3	1.30609	0.0309754	1.50898
	BASP1	1.30608	0.0353325	1.45183
	RAB19	1.30519	0.0109631	1.96007
	MMP9	1.3045	0.0014754	2.83109
	GREB1	1.29815	0.0405334	1.39219
	ARNTL2	1.29636	0.00342487	2.46536
	ZNF192P1	1.29527	0.0260388	1.58438
	SPIB	1.29269	0.01743	1.7587
	FAM151B	1.28443	0.0349761	1.45623
	AMOT	1.28256	0.0466786	1.33088
	HOXC9	1.28141	0.0407633	1.38973
	PCED1B	1.27805	0.0022342	2.65088
	PON2	1.26957	0.0197406	1.70464
	CD200	1.26148	0.0191354	1.71816
	C16orf45	1.25701	0.0183564	1.73621
	ZNF438	1.25076	0.0158192	1.80081
	ATF3	1.24633	0.0426852	1.36972
	LYN	1.24443	0.00597077	2.22397
	OR10A6	1.2443	0.0103774	1.98391
	LINC01389	1.24378	0.0227452	1.64311
	ESR2	1.24013	0.0214893	1.66778
	ASIC2	1.23755	0.0454426	1.34254
	ETV1	1.23333	0.0379269	1.42105
	LOC101927418	1.23097	0.0250543	1.60112
	LINC00271	1.22984	0.00335477	2.47434
	KLHDC9	1.22662	0.0133517	1.87446
	ZBTB32	1.22647	0.0298036	1.52573
	LURAP1	1.22329	0.0475756	1.32262
	CTSZ	1.21794	0.00196754	2.70608
	PTPRVP	1.2156	0.0103975	1.98307
	LATS2	1.21287	0.016417	1.78471
	PLXNB2	1.20989	0.0282364	1.54919
	C9orf3	1.20883	0.00213977	2.66963
	SLC2A8	1.20674	0.0166267	1.77919
	GPNMB	1.20503	0.00785453	2.10488
	C8orf37	1.20337	0.00429564	2.36697
	METRNL	1.19929	0.00103371	2.9856
	MIR1587	1.19799	0.0128746	1.89027
	LOC101927702	1.19444	0.0227642	1.64275
	CDH24	1.18354	0.013189	1.87979
	FLJ46906	1.18239	0.0306541	1.51351
	ZBTB24	1.16911	0.0208918	1.68002
	FOXP4-AS1	1.16881	0.0311165	1.50701
	LAG3	1.16837	0.0387222	1.41204
	TAGAP	1.16646	0.0427165	1.3694
	MYADM	1.16613	0.00056	3.25181
	CST3	1.1648	0.0151554	1.81943
	PLA2G7	1.1631	0.0233052	1.63255
	SERPINB8	1.16207	0.000329	3.4828
	SUV420H2	1.16071	0.0158969	1.79869
	CDKN2A	1.15803	0.00159929	2.79607
	CELA1	1.15775	0.0289854	1.53782
	JSRP1	1.14638	0.036494	1.43778
	CDCA7L	1.14371	0.0327997	1.48413
	DNAH11	1.14292	0.0439382	1.35716
	HCG17	1.13935	0.030154	1.52065
	ADAMTSL1	1.13817	0.0184324	1.73442
	TAS2R45	1.13721	0.00175134	2.75663
	HYI	1.13296	0.0010526	2.97774
	CXCL1	1.12959	0.0145572	1.83692
	TMEM98	1.12952	0.0456846	1.34023
	C1orf106	1.12754	0.0379453	1.42084
	ATP11C	1.12667	0.000442	3.35458
	THBS4	1.1201	0.0372105	1.42933
	PPT2	1.1186	0.00198133	2.70304
	BBS12	1.11778	5.21e-05	4.28316
	ANKRD33B	1.11652	0.0244833	1.61113
	LOC100128340	1.1068	0.034868	1.45757
	FABP5	1.10321	0.0467924	1.32983
	CEP41	1.09518	0.04324	1.36411
	ADPRH	1.09381	0.0143806	1.84222
	IL10	1.09193	0.0221951	1.65374
	LMO2	1.0881	0.0020799	2.68196
	CYFIP1	1.08579	0.01628	1.78835
	AZGP1P1	1.08231	0.0106585	1.9723
	C1orf56	1.07547	0.0117819	1.92879
	LINC00173	1.07312	0.0010828	2.96545
	TMCC2	1.06942	0.00817592	2.08746
	PIR	1.06905	0.0023946	2.62077
	PAK6	1.06869	0.0349304	1.4568
	QPRT	1.06785	0.021229	1.67307
	POU3F1	1.06589	0.00198242	2.7028
	TSPAN4	1.06509	0.0100727	1.99685
	PTGDS	1.0626	0.0131778	1.88016
	MPZL1	1.05741	0.00405684	2.39181
	DERL3	1.0552	0.0139016	1.85694
	TNFSF4	1.05391	0.00598763	2.22275
	BMP2K	1.05208	0.000967	3.01457
	TAS2R30	1.04909	0.0350229	1.45565
	LOC102723817	1.0488	0.000672	3.17263
	LINC01366	1.04244	0.0204982	1.68828
	PLK2	1.03848	0.0273417	1.56318
	KIAA1598	1.03411	0.0202616	1.69333
	NIPAL1	1.03404	0.00131091	2.88243
	APOE	1.03397	0.0009	3.04576
	RGPD4-AS1	1.02926	0.034578	1.4612
	GJB7	1.02853	0.049817	1.30262
	SLC22A20	1.02788	0.00985766	2.00623
	CT55	1.02731	0.0149334	1.82584
	CDKN1C	1.02704	0.0349701	1.4563
	FGFR1	1.02026	0.000352	3.45346
	SMARCA2	1.02007	0.00186786	2.72866
	B4GALT1-AS1	1.01513	0.00684538	2.1646
	ZCCHC5	1.0146	0.0142255	1.84693
	FCRLA	1.01416	0.0413356	1.38368
	MYLIP	1.00884	0.00169876	2.76987
	FOXD4L5	1.00388	0.0367031	1.4353
	GNB3	0.999219	0.0328337	1.48368
	CASC18	0.997078	0.0457621	1.33949
	ADI1	0.992461	0.00579752	2.23676
	PTPRS	0.987717	0.0259964	1.58509
	AIG1	0.984759	0.00692191	2.15977
	ZNF768	0.984565	0.00733997	2.13431
	ADAMTSL2	0.984174	0.0074694	2.12671
	CC2D2B	0.982149	0.0457622	1.33949
	TRG-AS1	0.981233	0.00679471	2.16783
	IFNA22P	0.980187	0.0351512	1.45406
	DHODH	0.979879	0.0286014	1.54361
	ANXA2	0.979412	0.0387997	1.41117
	KIAA1324	0.97695	0.00234338	2.63016
	PIK3CD-AS2	0.976905	0.0123328	1.90894
	PIGZ	0.972197	0.00271806	2.56574
	BRPF3	0.971024	0.0194866	1.71026
	PTCH1	0.970057	0.00440361	2.35619
	CD247	0.969573	0.00344504	2.46281
	PVR	0.968794	0.0375409	1.42549
	HBS1L	0.965336	0.00347208	2.45941
	HIVEP1	0.96428	0.00105804	2.9755
	VNN2	0.960629	0.00253578	2.59589
	NIPA1	0.959176	0.0140622	1.85195
	PHLDB1	0.957477	0.0242156	1.6159
	RARA-AS1	0.954086	0.0381427	1.41859
	PIK3C2A	0.94989	0.0117023	1.93173
	KIZ	0.949244	0.00163636	2.78612
	RGCC	0.94518	0.0231075	1.63625
	PRNP	0.945058	0.000628	3.20204
	IKZF4	0.943968	0.0425909	1.37068
	SDCBP2	0.943814	0.00341872	2.46614
	AKR1E2	0.942494	0.0206048	1.68603
	SCCPDH	0.941211	0.00687652	2.16263
	MRS2P2	0.940733	0.041584	1.38107
	C1orf21	0.940649	0.0221301	1.65502
	KIF1B	0.936999	0.0127045	1.89604
	CAB39L	0.936708	0.0184816	1.73326
	CXCR4	0.935386	0.00690427	2.16088
	EFNB2	0.930679	0.0184769	1.73337
	IL2RA	0.929665	0.0341308	1.46685
	GRAMD1B	0.929599	0.0309069	1.50995
	MARVELD1	0.928827	0.0371935	1.42953
	INPP5F	0.926517	0.0105395	1.97718
	PDE4A	0.926097	0.0331977	1.47889
	RNA5-8S5	0.925338	0.0335235	1.47465
	ATXN1L	0.92478	0.00574597	2.24064
	ITM2A	0.923479	0.000466	3.33161
	CITED2	0.918432	0.0116408	1.93402
	INA	0.917885	0.0205226	1.68777
	PTPN11	0.915375	0.00118365	2.92678
	BTN1A1	0.914009	0.0268164	1.5716
	KCNK1	0.912516	0.00670015	2.17392
	ABCC1	0.91108	0.018146	1.74122
	C1orf61	0.907496	0.0266901	1.57365
	C9orf47	0.905216	0.00806165	2.09358
	SEC14L2	0.904804	0.0406837	1.39058
	GJD3	0.903486	0.0124453	1.90499
	LOC100128644	0.9018	0.0302199	1.51971
	IGF1R	0.901433	0.0300935	1.52153
	BUB1B	0.898684	0.0349734	1.45626
	ACVR2A	0.895946	0.00521872	2.28244
	ANKRD13B	0.895514	0.0412043	1.38506
	MAP3K8	0.894903	0.00747142	2.1266
	GFOD1	0.890601	4.74e-05	4.32422
	SLC25A4	0.88984	0.0345475	1.46158
	PRDM2	0.888547	0.0269324	1.56973
	YPEL5	0.886601	0.000152	3.81816
	THADA	0.88384	0.00214219	2.66914
	IRF8	0.883584	0.0304701	1.51613
	PAM	0.880798	0.00115658	2.93683
	ANXA2P1	0.880093	0.0443998	1.35262
	JPH4	0.879799	0.010365	1.98443
	ACY3	0.879253	0.0366325	1.43613
	CNGA1	0.877984	0.0319846	1.49506
	ITGB8	0.876145	0.00616689	2.20993
	VKORC1L1	0.875537	0.0208802	1.68026
	FLJ40194	0.875461	0.00197112	2.70529
	EDAR	0.874337	0.0217802	1.66194
	PPP1R9A	0.872943	0.0479727	1.31901
	NBAT1	0.871192	0.00283932	2.54679
	LOC441204	0.86698	0.0412851	1.38421
	LPP-AS2	0.866215	0.0124473	1.90492
	HYKK	0.862448	0.000366	3.43652
	LIF	0.862195	0.0205526	1.68713
	EVC	0.856511	0.00603062	2.21964
	SMCO2	0.856101	0.00857049	2.06699
	KLK10	0.855084	0.00591845	2.22779
	KLF7	0.852753	0.0184575	1.73383
	LOC101929574	0.84914	0.0199924	1.69914
	ABCG5	0.846269	0.0405978	1.3915
	TOR4A	0.840143	0.00528403	2.27704
	CLEC18C	0.840063	0.00517031	2.28648
	TRIM2	0.837518	0.0101512	1.99348
	DYNC2LI1	0.835885	0.0489603	1.31016
	SRD5A3	0.834538	0.0141756	1.84846
	ADD3	0.834373	0.0200727	1.69739
	VAV2	0.831285	0.0252147	1.59835
	KSR2	0.830834	0.0060195	2.22044
	RPS26	0.830554	0.0429916	1.36662
	CNIH3	0.829792	0.00804294	2.09458
	S1PR1	0.82853	0.0456295	1.34075
	NCKAP1	0.827373	0.00540095	2.26753
	LOC101929099	0.826955	0.0332284	1.47849
	NFIA	0.825614	0.0131734	1.8803
	PTGER4	0.825073	0.0055438	2.25619
	RCSD1	0.824273	0.00382884	2.41693
	FAM87A	0.823767	0.047255	1.32555
	ATHL1	0.823595	0.00959568	2.01792
	FMO6P	0.822119	0.0487876	1.31169
	KIAA1671	0.821663	0.0232221	1.6341
	STON1	0.821135	0.013342	1.87478
	IRX6	0.819847	0.0416633	1.38025
	REEP2	0.814711	0.00902272	2.04466
	MREG	0.812637	0.0213016	1.67159
	HMGN3	0.811082	0.00813326	2.08974
	RNF43	0.809984	0.0001	4
	TSPAN13	0.809585	0.0100222	1.99904
	NTN3	0.808684	0.024077	1.6184
	NUDT3	0.808313	3.04e-05	4.51713
	GRAMD3	0.807934	0.00300121	2.5227
	POU3F4	0.80679	0.0341853	1.46616
	BMF	0.806759	0.00298844	2.52456
	C1QTNF9B-AS1	0.805537	0.0228581	1.64096
	PVRL2	0.805407	0.00675975	2.17007
	ERMP1	0.804384	0.0184565	1.73385
	OTP	0.801687	0.0431346	1.36517
	SYNE2	0.800829	0.0238645	1.62225
	NF1P2	0.798296	0.00292821	2.5334
	NTRK3	0.797013	0.00602074	2.22035
	CERS6-AS1	0.794768	0.0367913	1.43426
	NINJ1	0.793389	0.0195393	1.70909
	NCF2	0.793059	0.0063644	2.19624
	ACAT1	0.792625	0.000435	3.36151
	POU2AF1	0.791462	0.00763737	2.11706
	ANGPTL6	0.790686	0.000126	3.89963
	SMAD7	0.790626	0.0190836	1.71934
	LOC101927838	0.789765	0.0428211	1.36834
	MAP1LC3A	0.789322	0.0213565	1.67047
	PLEKHF2	0.787929	0.00388549	2.41055
	TSPAN3	0.786841	0.00882937	2.05407
	CDK2AP1	0.785795	0.00307392	2.51231
	GYS1	0.785548	0.00103297	2.98591
	CPT1A	0.782691	0.0271631	1.56602
	ILDR2	0.78227	0.0127134	1.89574
	DOCK5	0.780973	0.0377014	1.42364
	STX17-AS1	0.777359	0.0163001	1.78781
	TPP1	0.776168	0.00615623	2.21069
	STARD9	0.775978	0.0281934	1.54985
	CDK6	0.775147	0.000275	3.56067
	AZGP1	0.774246	0.0037311	2.42816
	BBC3	0.772025	0.0104659	1.98022
	IQCJ-SCHIP1-AS1	0.768942	0.0233514	1.63169
	GANC	0.768007	0.000733	3.1349
	MIS18BP1	0.767809	0.000512	3.29073
	NOXO1	0.766781	0.0268523	1.57102
	LSM11	0.766229	0.00689318	2.16158
	ARHGAP11A	0.76576	0.00246728	2.60778
	GFPT1	0.762437	0.00234128	2.63055
	ZFYVE9	0.76137	0.00922932	2.03483
	ELMO1	0.761209	0.00804688	2.09437
	POU3F3	0.759142	0.0191724	1.71732
	B3GNT9	0.757078	0.0496868	1.30376
	SELL	0.754306	0.0270153	1.56839
	HERC3	0.753967	0.0423156	1.3735
	NAT14	0.753699	0.0251571	1.59934
	INF2	0.753592	0.013086	1.88319
	HCRT	0.752996	0.012793	1.89303
	PLA2G4E	0.751997	0.0032248	2.4915
	SH2D1A	0.751935	0.00621323	2.20668
	BCORP1	0.750313	0.041896	1.37783
	ZNRF3	0.750208	0.00142377	2.84656
	AGA	0.749652	0.00247787	2.60592
	WSB2	0.7495	0.00357302	2.44696
	FANCC	0.74865	0.0457708	1.33941
	MINOS1-NBL1	0.748073	0.0214466	1.66864
	UST	0.747579	0.0154166	1.81201
	LOC101929237	0.746742	0.00227975	2.64211
	LOC646626	0.743737	0.0432341	1.36417
	IFI30	0.74219	0.0387749	1.41145
	TNFRSF4	0.742135	0.0111714	1.95189
	ZNF774	0.742	0.038272	1.41712
	NR3C1	0.740532	0.00330372	2.481
	TAS2R43	0.740224	0.0302105	1.51984
	CLEC17A	0.739611	0.0183233	1.737
	PLCL1	0.739275	0.0418623	1.37818
	ARRB1	0.738987	0.0170938	1.76716
	C5orf30	0.738955	0.0388336	1.41079
	TAS2R31	0.73799	0.0433126	1.36339
	NOL3	0.737883	0.0370912	1.43073
	STARD3NL	0.737173	0.0173672	1.76027
	LOC101927085	0.736507	0.0236602	1.62598
	SHH	0.7358	0.0353596	1.45149
	HP	0.733801	0.0466542	1.33111
	KIF21A	0.733447	0.0445773	1.35089
	HMGB3	0.729199	0.0034751	2.45903
	TFDP2	0.728731	0.00521488	2.28276
	RPRD1A	0.724862	0.0220697	1.6562
	KCNE5	0.724496	0.0147758	1.83045
	LOC101927557	0.722592	0.00651742	2.18592
	ACY1	0.717903	0.00422251	2.37443
	HIF1A	0.716596	0.00639126	2.19441
	SLCO3A1	0.715215	0.0200452	1.69799
	SMIM1	0.714448	0.00636345	2.19631
	SYNE3	0.712154	0.0344809	1.46242
	SYNGR2	0.710134	0.00887032	2.05206
	TCOF1	0.709964	0.000595	3.22548
	VWA8	0.706873	7.28e-05	4.13787
	DIP2B	0.706626	0.00209633	2.67854
	ATXN1	0.70583	0.00821461	2.08541
	MANSC1	0.702339	0.034404	1.46339
	AHI1	0.70042	0.0032588	2.48694
	BTLA	0.700014	0.024763	1.6062
	CREB3L2	0.699805	0.0129145	1.88892
	SMG7-AS1	0.698766	0.0333295	1.47717
	GTDC1	0.697714	0.00274042	2.56218
	LOC100996404	0.695716	0.0327417	1.4849
	SIRPG-AS1	0.695109	0.013757	1.86147
	PRDM12	0.690222	0.0241516	1.61705
	RHBDL3	0.688927	0.0253366	1.59625
	FCRL1	0.688567	0.0319361	1.49572
	ZNF815P	0.688128	0.00675737	2.17022
	SLC25A13	0.688112	0.000876	3.0575
	TCTN1	0.68803	0.00476739	2.32172
	ARHGAP10	0.687506	0.00238952	2.62169
	RAPH1	0.686145	0.0123501	1.90833
	DOC2A	0.686082	0.00418682	2.37812
	TPST2	0.685773	0.0355149	1.44959
	SLFN12	0.683966	0.0227491	1.64304
	CIT	0.683145	0.023498	1.62897
	SNAP23	0.683052	0.000978	3.00966
	DUSP2	0.682896	0.0480973	1.31788
	CEP55	0.682779	0.00225633	2.6466
	EFS	0.682161	0.0413543	1.38348
	CTNNAL1	0.679888	0.0388015	1.41115
	NCR3LG1	0.679662	0.0394759	1.40367
	CNTRL	0.679184	0.0120795	1.91795
	PTTG1	0.678334	0.00180167	2.74433
	LRRC16B	0.678238	0.022037	1.65685
	CREG1	0.676909	0.0476104	1.3223
	DKK3	0.676143	0.0399645	1.39833
	PTTG2	0.675742	0.00495034	2.30536
	CES4A	0.674185	0.000624	3.20482
	LOC100240735	0.673777	0.034666	1.4601
	TXNDC12-AS1	0.672958	0.0172102	1.76422
	PRRG4	0.672034	0.0105623	1.97624
	EPHX2	0.67073	0.0138751	1.85776
	PHYH	0.669871	0.00841092	2.07516
	LINC01220	0.669621	0.0196218	1.70726
	CCNYL1	0.665375	0.00859495	2.06576
	NPTN	0.663495	0.000628	3.20204
	SERTAD2	0.66302	0.0134463	1.8714
	CD82	0.658606	0.0146285	1.8348
	GCLC	0.658554	0.0348087	1.45831
	PLEKHN1	0.658042	0.00907842	2.04199
	HDAC7	0.657889	0.00273751	2.56264
	BMI1	0.65761	0.000896	3.04769
	WNT10A	0.65551	0.0190078	1.72107
	KIAA0825	0.653794	0.048999	1.30981
	RHOC	0.6529	0.0246621	1.60797
	CNIH4	0.651664	0.000112	3.95078
	ATP13A3	0.651092	0.00836385	2.07759
	SMIM8	0.650846	0.0435936	1.36058
	CASP9	0.650589	0.0104018	1.98289
	LYST	0.650109	0.00167521	2.77593
	LINC00917	0.64723	0.049643	1.30414
	SFXN1	0.647141	0.0095539	2.01982
	C14orf178	0.647062	0.0498662	1.30219
	APOBEC3G	0.64614	0.0052304	2.28146
	MSI2	0.643472	0.000974	3.01144
	ITGAV	0.643431	0.00429515	2.36702
	CORO1C	0.640697	0.00663503	2.17816
	CACNG3	0.640254	0.013733	1.86223
	OR7E14P	0.640072	0.0232322	1.63391
	APLP2	0.638323	0.0203504	1.69143
	SMIM13	0.638277	0.0385045	1.41449
	RIMS3	0.637407	0.0115071	1.93903
	SNORD22	0.637036	0.0163674	1.78602
	CCDC28B	0.634744	0.0231197	1.63602
	YPEL1	0.634672	0.00328558	2.48339
	PLCL2	0.63457	0.0148312	1.82882
	H1FX-AS1	0.634292	0.00859315	2.06585
	PBOV1	0.633899	0.00569849	2.24424
	CKAP4	0.633654	0.0267377	1.57288
	LINC00159	0.633418	0.0487218	1.31228
	HS6ST1	0.63131	0.0230205	1.63788
	TXNDC11	0.631128	0.00501442	2.29978
	TMC3-AS1	0.631044	0.0175171	1.75654
	BEST4	0.630313	0.00755553	2.12174
	FAM212B	0.628709	0.00958295	2.0185
	GSTM5	0.627267	0.0317419	1.49837
	LGALS3	0.626937	0.048299	1.31606
	SH2B3	0.626218	0.00850152	2.0705
	LINC01573	0.625783	0.00746043	2.12724
	KIFC3	0.623776	0.0134417	1.87155
	ARNT	0.622515	0.0357752	1.44642
	EP400NL	0.622405	0.00401297	2.39653
	TMBIM1	0.621347	0.00319168	2.49598
	SCAPER	0.619923	0.0178062	1.74943
	MBP	0.619775	0.0279177	1.55412
	HR	0.619657	0.0263897	1.57857
	HS2ST1	0.619514	0.000974	3.01144
	TBC1D7	0.619338	0.00302337	2.51951
	SKAP2	0.618635	0.0418965	1.37782
	FAM216A	0.616719	0.00278471	2.55522
	PRDM15	0.616023	0.0498298	1.30251
	D2HGDH	0.614968	0.00732778	2.13503
	DUSP19	0.614915	0.0368872	1.43312
	ANKIB1	0.613028	0.00234016	2.63075
	IGFBP4	0.612939	0.00693721	2.15882
	EIF2AK4	0.612536	0.000627	3.20273
	WARS	0.612282	0.0154405	1.81134
	RABGAP1L	0.611286	0.000243	3.61439
	MAPKAPK2	0.610717	0.00385244	2.41426
	PCED1B-AS1	0.609904	0.0232791	1.63303
	SPATA20	0.609494	0.0209378	1.67907
	C5orf42	0.609362	0.0280457	1.55213
	PTTG3P	0.608996	0.00427944	2.36861
	HECTD4	0.608209	0.0207714	1.68253
	TMEM40	0.607893	0.0345551	1.46149
	CASD1	0.605079	0.00790991	2.10183
	EZH2	0.604756	0.00553292	2.25705
	LOC101927959	0.604718	0.00569798	2.24428
	GNAS	0.602574	0.000252	3.5986
	ITK	0.602462	0.0320153	1.49464
	PTPN6	0.602299	0.00615652	2.21066
	SPN	0.601654	0.00546736	2.26222
	MBOAT7	0.600088	0.017804	1.74948
	DOC2B	0.599025	0.0455953	1.34108
	TMEM64	0.598079	0.0368915	1.43307
	NAB1	0.596324	0.0142937	1.84486
	ABHD2	0.594394	0.00110521	2.95655
	NARS2	0.59427	0.0142282	1.84685
	SAT1	0.593876	0.00124816	2.90373
	PDS5A	0.593868	0.00288984	2.53913
	CLDND1	0.593778	0.0148648	1.82784
	CLEC4A	0.591204	0.00166171	2.77944
	POGLUT1	0.590818	0.00632561	2.1989
	SLC35F2	0.589545	0.0495963	1.30455
	AGFG1	0.589312	0.000721	3.14206
	SLC7A5	0.588858	0.00717318	2.14429
	RBBP8	0.588579	0.0465277	1.33229
	VSIG10	0.586152	0.0321436	1.49291
	LIN52	0.585699	0.000833	3.07935
	SFMBT2	0.585253	0.00279797	2.55316
	B3GNT2	0.584421	0.0169073	1.77193
	SLC6A10P	0.584299	0.0304	1.51713
	RAB11FIP1	0.581347	0.00996344	2.00159
	CHP2	0.581054	0.0432418	1.3641
	MYO1G	0.580657	0.0291241	1.53575
	RRAS2	0.580261	0.0147684	1.83067
	MAMDC4	0.580033	0.0312977	1.50449
	AXDND1	0.579147	0.0181976	1.73999
	FANCL	0.577574	0.0392307	1.40637
	ANKRD34B	0.577327	0.0470926	1.32705
	RHEBL1	0.577306	0.0299983	1.5229
	MOSPD1	0.576838	0.0316644	1.49943
	SNORA21	0.576141	0.00734841	2.13381
	DR1	0.575897	0.00321604	2.49268
	P2RY10	0.573744	0.00277703	2.55642
	DENND1A	0.573469	0.00365291	2.43736
	AVEN	0.572075	0.000571	3.24336
	NUDT8	0.5719	0.0444308	1.35232
	NPL	0.570049	0.00802751	2.09542
	DCHS1	0.569937	0.0296574	1.52787
	LOC101927687	0.569827	0.00388933	2.41013
	PTK2	0.569814	0.00267737	2.57229
	CTTN	0.569137	0.0193797	1.71265
	ZMYND11	0.567031	0.0366938	1.43541
	LOC730100	0.564453	0.0359453	1.44436
	STAMBP	0.562474	0.000854	3.06854
	RILP	0.560105	0.020959	1.67863
	LOC100505501	0.559757	0.000458	3.33913
	ITFG3	0.558633	0.000607	3.21681
	CNIH1	0.55824	0.00165975	2.77996
	FBXO36	0.558239	0.0231137	1.63613
	OPN1MW	0.557476	0.0165656	1.78079
	EXOC6	0.557259	0.00858435	2.06629
	ERICH6	0.556551	0.0367683	1.43453
	SNAP47	0.556091	0.0364205	1.43865
	C11orf84	0.555864	0.0166425	1.77878
	ATP1B3	0.55528	0.0138174	1.85957
	DNMT3A	0.554566	0.00442427	2.35416
	LARP1B	0.553378	0.00349624	2.4564
	LINC00470	0.553199	0.0271551	1.56615
	LOC101929719	0.552866	0.0484109	1.31506
	LOC102724238	0.552487	0.0420382	1.37636
	PCNXL2	0.552347	0.0388187	1.41096
	COPG2	0.552053	0.0322451	1.49154
	ZNF281	0.548199	0.00172123	2.76416
	LOC102724715	0.548182	0.0381368	1.41866
	SLC16A5	0.547161	0.0209945	1.67789
	LAT2	0.546936	0.0368449	1.43362
	CERS4	0.546823	0.00933257	2.03
	RARRES3	0.546446	0.000834	3.07883
	TMC1	0.546304	0.0314648	1.50217
	OR2A5	0.545844	0.0398603	1.39946
	FAM3C	0.545608	0.00860857	2.06507
	MCUR1	0.5446	0.00436991	2.35953
	EGFL8	0.544306	0.0099399	2.00262
	ZNF219	0.544233	0.00471814	2.32623
	NEDD9	0.543192	0.0112248	1.94982
	LOC100507306	0.542596	0.0153184	1.81479
	LOC101927598	0.54171	0.045499	1.342
	LINC00184	0.541247	0.0215257	1.66704
	TIMMDC1	0.540063	0.00364555	2.43824
	ABCB6	0.539483	0.0185962	1.73058
	PDP1	0.539377	0.0355043	1.44972
	ACSL4	0.538138	0.0157796	1.8019
	CCDC102A	0.53781	0.0470346	1.32758
	PHF19	0.536952	0.000266	3.57512
	FAM159A	0.536384	0.0112904	1.94729
	EPS15	0.535172	0.00743145	2.12893
	GDF3	0.534194	0.0440478	1.35608
	ENSA	0.534177	0.000355	3.44977
	RGS5	0.534108	0.0277861	1.55617
	LANCL1-AS1	0.53209	0.0483996	1.31516
	SNX8	0.531931	0.0157446	1.80287
	CHST11	0.53189	0.0328156	1.48392
	LRRC8C	0.53156	0.000436	3.36051
	PIF1	0.531391	0.0137125	1.86288
	TGFA	0.529634	0.0431311	1.36521
	H19	0.528533	0.0484741	1.31449
	SNORD36C	0.528396	0.0256593	1.59076
	EZR	0.528138	0.00523416	2.28115
	FAM69A	0.527704	0.00811736	2.09058
	ENOX1-AS2	0.525709	0.00199963	2.69905
	UBE3B	0.525645	0.00625131	2.20403
	CAPRIN1	0.524817	0.0063519	2.1971
	PEX10	0.524628	0.00319904	2.49498
	AKAP11	0.524261	0.00545935	2.26286
	C2CD2	0.523794	0.0228015	1.64204
	CD58	0.523458	0.00609713	2.21487
	DNAJC1	0.522747	0.0120452	1.91918
	ORMDL1	0.522365	0.0486279	1.31311
	ACADVL	0.522243	0.00917015	2.03762
	USP24	0.521739	0.0108082	1.96625
	PSMB5	0.521727	0.0116129	1.93506
	ACSL1	0.521576	0.00247226	2.60691
	CLDND2	0.521424	0.0424044	1.37259
	ZNF821	0.519223	0.000331	3.48017
	HIBCH	0.518592	0.0284926	1.54527
	RNF208	0.516728	0.0210829	1.67607
	MYO3B	0.515238	0.034334	1.46428
	UQCRC2	0.513536	0.0110094	1.95824
	SNORD84	0.513427	0.0215714	1.66612
	BTG3	0.512264	0.00908033	2.0419
	NCOA1	0.511946	0.00461993	2.33536
	PABPC1L	0.511115	0.0317788	1.49786
	LRMP	0.51072	0.00130126	2.88564
	CCDC6	0.510542	0.0022779	2.64246
	ZNF580	0.510502	0.00387327	2.41192
	DOC2GP	0.509364	0.0312504	1.50515
	ST8SIA4	0.50934	0.00850343	2.07041
	CLASP1	0.509278	0.0341505	1.4666
	LOC100131048	0.508105	0.0455681	1.34134
	TFRC	0.508054	0.0113449	1.9452
	MTHFD1L	0.507646	0.0479781	1.31896
	SLC41A1	0.50755	0.0268402	1.57121
	SND1	0.507017	0.00146782	2.83333
	CRISPLD2	0.506011	0.0488935	1.31075
	TMEM198	0.505062	0.00430175	2.36635
	FAM107B	0.503779	0.00376965	2.4237
	TIGIT	0.50308	0.000192	3.7167
	C3orf79	0.502741	0.0485405	1.3139
	FAM78B	0.50235	0.0291243	1.53574
	AMZ2P1	0.502268	0.0145552	1.83698
	EED	0.50102	0.000716	3.14509
	RAG1	0.500149	0.0232069	1.63438
	VPREB3	0.499565	0.0032887	2.48298
	SMYD3	0.498984	0.027532	1.56016
	ATP7A	0.498686	0.0173551	1.76057
	TIMM10	0.496831	0.0450898	1.34592
	CARD6	0.496817	0.0208471	1.68095
	HEATR5A	0.496259	0.0296287	1.52829
	HMBS	0.495823	0.0440685	1.35587
	PARL	0.495774	0.00330529	2.48079
	TTYH3	0.49466	0.0131945	1.87961
	ST6GALNAC4	0.494188	0.0375622	1.42525
	MCCC2	0.492054	0.00393732	2.4048
	FAM175A	0.491994	0.0061447	2.2115
	METTL21A	0.491207	0.00550558	2.2592
	ABCB10	0.490734	0.00116672	2.93304
	CHADL	0.490453	0.025458	1.59418
	AKT3	0.485413	0.000525	3.27984
	SGCB	0.48507	0.0101165	1.99497
	ARHGAP33	0.484332	0.0282612	1.54881
	CNOT4	0.483775	0.00713319	2.14672
	LOC100505622	0.483467	0.0185765	1.73104
	PPCDC	0.48255	0.0208742	1.68039
	IL4R	0.482332	0.0188157	1.72548
	LMNB2	0.481485	0.0259316	1.58617
	CNOT6L	0.481468	0.00834409	2.07862
	KLF12	0.480548	0.0271597	1.56607
	PHLDB3	0.480162	0.0323532	1.49008
	C5	0.479517	0.0496922	1.30371
	LOC100130691	0.478943	0.0401045	1.39681
	CRELD1	0.478163	0.0130895	1.88308
	NTNG2	0.478045	0.0114591	1.94085
	SPINK7	0.477515	0.0286934	1.54222
	MFHAS1	0.477262	0.0315448	1.50107
	GOLGA2P7	0.476918	0.0111249	1.95371
	CMC1	0.476381	0.00882592	2.05424
	EVI5	0.475594	0.0068624	2.16352
	KBTBD13	0.475002	0.0235639	1.62775
	SNHG17	0.47492	0.0308679	1.51049
	ARFIP1	0.474293	0.00840754	2.07533
	GRAMD4	0.47409	0.0167224	1.7767
	TMEM106A	0.473799	0.0300915	1.52156
	H2AFZ	0.472271	0.0189315	1.72282
	ITPK1-AS1	0.471732	0.041138	1.38576
	NRSN2	0.469501	0.0319929	1.49495
	SCARA3	0.469468	0.015206	1.81799
	MIR181A1HG	0.46945	0.0377299	1.42331
	TARBP1	0.469245	0.0050374	2.29779
	ATP8A1	0.468898	0.00782272	2.10664
	CLK1	0.46824	0.00228787	2.64057
	TPP2	0.468075	0.00358418	2.44561
	SETDB1	0.467824	0.00622024	2.20619
	SLC16A1	0.466618	0.0338854	1.46999
	BFSP2-AS1	0.466454	0.0143262	1.84387
	UBALD2	0.466429	0.013445	1.87144
	ADCY3	0.466241	0.00150965	2.82112
	NNAT	0.466226	0.0498947	1.30195
	GNS	0.466172	0.0473608	1.32458
	ZFPM1	0.466168	0.0327603	1.48465
	ILK	0.465673	0.00207946	2.68205
	FLJ42627	0.465666	0.025317	1.59659
	PTP4A1	0.465609	0.0269017	1.57022
	FEM1B	0.465251	0.0122374	1.91231
	SLC35A5	0.464936	0.0259018	1.58667
	ING3	0.462716	0.0233829	1.6311
	APC2	0.462289	0.0466789	1.33088
	NRIP1	0.461401	0.00648873	2.18784
	MCU	0.460835	0.000582	3.23508
	LRRC1	0.460712	0.0416622	1.38026
	ALDH1A1	0.460705	0.0191546	1.71773
	C5orf56	0.459385	0.00714972	2.14571
	ACTA2	0.457797	0.0336947	1.47244
	VCL	0.457527	0.0134412	1.87156
	AUH	0.45742	0.000565	3.24795
	NF1	0.457043	0.0108189	1.96582
	BMS1	0.456625	0.0385428	1.41406
	C1orf53	0.456111	0.0449639	1.34714
	THG1L	0.456074	0.027801	1.55594
	TNFRSF10B	0.45513	0.0249885	1.60226
	TRMT44	0.455109	0.0473919	1.3243
	MID1IP1	0.455065	0.0249962	1.60213
	DPYD	0.45428	0.030091	1.52156
	FRAS1	0.454243	0.0377797	1.42274
	BTN2A2	0.453434	0.0294706	1.53061
	TCEA2	0.453024	0.00291568	2.53526
	SLC39A8	0.452887	0.0120048	1.92064
	PPTC7	0.452645	0.00126077	2.89936
	ADAM10	0.452491	0.00318019	2.49755
	STX7	0.45175	0.0165777	1.78048
	ORAI3	0.451287	0.00177989	2.74961
	ARL6IP5	0.451182	0.012874	1.89029
	KLHDC2	0.450483	0.00144008	2.84161
	EXD3	0.449735	0.0018226	2.73931
	CDX4	0.449538	0.0234031	1.63073
	ZSCAN20	0.447816	0.0360612	1.44296
	GCAT	0.447783	0.0119669	1.92202
	SLIT1-AS1	0.44751	0.028377	1.54703
	HACE1	0.447408	0.00129712	2.88702
	RNF19A	0.446948	0.00167349	2.77638
	USP17L7	0.446942	0.0338787	1.47007
	PPP1CC	0.446062	0.0153092	1.81505
	TMBIM6	0.445658	0.0183013	1.73752
	LOC101928915	0.444177	0.0218908	1.65974
	FAM163B	0.443779	0.0300577	1.52204
	SPHK2	0.443438	0.000266	3.57512
	SPAG4	0.443191	0.00682035	2.16619
	TOX	0.443107	0.00385231	2.41428
	TRAK1	0.44299	0.00451073	2.34575
	ZNF197-AS1	0.442526	0.0147856	1.83016
	TTK	0.441302	0.00663119	2.17841
	BCL6	0.441237	0.0417173	1.37968
	VAPB	0.440837	0.00463766	2.3337
	CD53	0.44074	0.00660183	2.18034
	SLC46A3	0.440642	0.0344864	1.46235
	CASK	0.439822	0.00437495	2.35903
	TP53AIP1	0.43948	0.020041	1.69808
	ZNF226	0.438503	0.00510771	2.29177
	NUSAP1	0.438157	0.039479	1.40363
	MSN	0.437957	0.00258981	2.58673
	FAM179B	0.437874	0.0095862	2.01835
	JADE2	0.437105	0.00990956	2.00395
	SLC35B2	0.437057	0.000578	3.23807
	SIX5	0.436181	0.0222093	1.65347
	GNB1	0.436144	0.0116387	1.9341
	SYNCRIP	0.436116	0.0066387	2.17792
	SYT11	0.43522	0.00449996	2.34679
	NDFIP2	0.435079	0.00748817	2.12562
	RPS6	0.434877	0.0247398	1.6066
	PUS7	0.434299	0.0026413	2.57818
	HSF5	0.43418	0.0421991	1.3747
	UHRF1BP1L	0.433833	0.0428903	1.36764
	SOD1	0.433542	0.020986	1.67807
	NEFL	0.43332	0.00603954	2.219
	AGPAT3	0.433055	0.00162716	2.78857
	MSH3	0.433037	0.0155942	1.80704
	HSD17B7	0.430899	0.0326676	1.48588
	NF2	0.430865	0.0280274	1.55242
	CHST7	0.430057	0.0137499	1.8617
	APMAP	0.42973	0.0462255	1.33512
	RAB27A	0.429068	0.00349969	2.45597
	HNRNPA1	0.429018	0.013499	1.8697
	MAGEF1	0.428741	0.0196843	1.70588
	ZWILCH	0.428605	0.0244989	1.61085
	RETSAT	0.428424	0.0374573	1.42646
	RBBP4	0.42806	0.00479067	2.3196
	SNORA26	0.427336	0.0318489	1.49691
	SNORA61	0.426704	2.25e-05	4.64782
	WHSC1	0.426568	0.00301023	2.5214
	WARS2	0.425942	0.0490357	1.30949
	EIF2AK3	0.425204	0.0437357	1.35916
	APOM	0.42473	0.0377521	1.42306
	THTPA	0.423345	0.0132712	1.87709
	ANXA7	0.422685	0.00161079	2.79296
	TAF10	0.422274	0.0379169	1.42117
	IL20RB	0.421726	0.0455455	1.34155
	SGPP2	0.421682	0.00799931	2.09695
	COQ10A	0.421378	0.00389898	2.40905
	DNAAF1	0.421131	0.0482351	1.31664
	RHBDD2	0.420998	0.00246589	2.60803
	TDRD3	0.420512	0.00036	3.4437
	CENPJ	0.420512	0.0423108	1.37355
	PIGL	0.420129	0.0052165	2.28262
	C4orf32	0.41973	0.0386053	1.41335
	ATN1	0.419522	0.026353	1.57917
	MANF	0.419429	0.0227593	1.64284
	LYPLA1	0.419323	0.00982546	2.00765
	LOC102723692	0.418333	0.0496626	1.30397
	GRM7-AS3	0.418027	0.0138764	1.85772
	LOC101928433	0.417699	0.0384904	1.41465
	MBNL2	0.417578	0.0216016	1.66551
	CTLA4	0.417514	0.0427478	1.36909
	IFT43	0.417398	0.000275	3.56067
	MIR4458HG	0.41685	0.000631	3.19997
	RFTN1	0.415888	0.00243815	2.61294
	KIF5B	0.415651	0.00485901	2.31345
	RAB9A	0.415507	0.000692	3.15989
	CAMK2A	0.4143	0.0168181	1.77422
	CDYL2	0.41414	0.00730704	2.13626
	MKRN2	0.41308	0.0474564	1.32371
	SETD3	0.412269	0.0143381	1.84351
	IKBIP	0.411791	0.0177732	1.75023
	ZSWIM4	0.411329	0.00441714	2.35486
	GPN3	0.411238	0.0048066	2.31816
	SNORD38A	0.411157	0.000177	3.75203
	C6orf164	0.41051	0.0273151	1.5636
	ANKRD16	0.410261	0.0274738	1.56108
	SLAMF6	0.410185	0.0264305	1.57789
	NUDT6	0.409365	0.00726106	2.139
	GMNN	0.409342	0.00611436	2.21365
	CHID1	0.40903	0.00513412	2.28953
	PLXNA1	0.408896	0.0160776	1.79378
	CSNK2A1	0.40867	0.00386129	2.41327
	GTF2F2	0.408458	0.00303978	2.51716
	CUL1	0.408078	0.00832652	2.07954
	MRPS6	0.408026	0.0371888	1.42959
	FUT8	0.407638	0.00343219	2.46443
	ZCCHC14	0.407572	0.0323646	1.48993
	APOBEC3F	0.404002	0.00543833	2.26453
	CARHSP1	0.403629	0.0264585	1.57744
	SMYD4	0.403604	0.0469294	1.32855
	SLMO2	0.403559	0.0189533	1.72232
	PKM	0.403455	0.0165718	1.78063
	MAPKAPK3	0.402326	0.0245647	1.60969
	STK17B	0.402042	0.0134604	1.87094
	FDXR	0.401063	0.024725	1.60686
	CEP152	0.399365	0.000816	3.08831
	GLUD1P7	0.39906	0.0245583	1.6098
	DHTKD1	0.398665	0.000572	3.2426
	HNRNPH1	0.398217	0.00825116	2.08348
	AQP2	0.398149	0.0217762	1.66202
	CLPB	0.398074	0.0338419	1.47055
	MAN1B1	0.396842	0.0465348	1.33222
	PDHA1	0.396616	0.00326348	2.48632
	AK2	0.396413	0.0207894	1.68216
	PHF13	0.39639	0.0118922	1.92474
	SNORD54	0.39638	0.0328191	1.48387
	CSRNP1	0.39634	0.0468312	1.32947
	PEG3-AS1	0.395456	0.0423343	1.37331
	SLC38A2	0.395202	0.020983	1.67813
	CALY	0.394733	0.0152974	1.81538
	MYL6B	0.394052	0.016568	1.78073
	RAD23B	0.393137	0.00150463	2.82257
	PNKP	0.39298	0.00456595	2.34047
	FAM131A	0.392952	0.0155207	1.80909
	PMF1	0.39285	0.00449303	2.34746
	2020-09-11	0.392512	0.0346588	1.46019
	LOC374443	0.392126	0.0181644	1.74078
	KIAA1804	0.391893	0.0379623	1.42065
	TRA2B	0.391016	0.00207316	2.68337
	LOC101929946	0.390973	0.0188932	1.72369
	COMMD10	0.390862	0.00465355	2.33222
	NRCAM	0.390136	0.0258776	1.58708
	NFYC	0.390102	0.0171485	1.76577
	AP1M1	0.389084	0.00252571	2.59762
	USP17L8	0.388749	0.0188075	1.72567
	EIF4E	0.388493	0.0122111	1.91325
	PCMTD2	0.388213	0.00212511	2.67262
	SLC44A1	0.388163	0.0449972	1.34681
	ATG12	0.387831	0.00348993	2.45718
	TTC7A	0.386636	0.00714143	2.14621
	NDFIP1	0.386115	0.0165003	1.78251
	MIR381HG	0.386109	0.0210956	1.67581
	FKBP15	0.38504	0.00787392	2.10381
	RACGAP1	0.384609	0.0335224	1.47466
	HTR1D	0.384606	0.0201692	1.69531
	APOBEC3C	0.382798	0.0046872	2.32909
	CORO7	0.38245	0.0024434	2.61201
	SLC25A2	0.382372	0.0466252	1.33138
	TMEM189	0.381939	0.0178626	1.74806
	TMEM117	0.38174	0.0263246	1.57964
	PYCRL	0.38142	0.0371423	1.43013
	C1orf86	0.381188	0.0363629	1.43934
	WDR45	0.380748	0.0166668	1.77815
	WHAMMP1	0.380744	0.0108178	1.96586
	PSTPIP1	0.380678	0.0413548	1.38347
	LRCH1	0.377752	0.0415919	1.38099
	FAM182B	0.377302	0.0425419	1.37118
	GNA12	0.376384	0.0166853	1.77767
	VDAC1	0.376285	0.00300932	2.52153
	PPP1R16B	0.376194	0.00675338	2.17048
	ATRAID	0.376001	0.00209331	2.67917
	MAPK1IP1L	0.375654	0.0310581	1.50783
	FAM53B	0.375193	0.0221019	1.65557
	GTPBP2	0.375045	0.00173347	2.76108
	MKRN7P	0.375009	0.0136909	1.86357
	ACSF2	0.374779	0.0320815	1.49374
	TLL1	0.374662	0.0325589	1.48733
	PRR34-AS1	0.374559	0.0229056	1.64006
	DVL2	0.37447	0.00894268	2.04853
	TLE4	0.374388	0.0300717	1.52184
	PRMT3	0.374052	0.0223631	1.65047
	DNAL1	0.373574	0.0267774	1.57223
	ALG14	0.373417	0.0136302	1.8655
	PRKCH	0.37326	0.00616707	2.20992
	TBK1	0.37318	0.00356003	2.44855
	TCAF1	0.373169	0.0181351	1.74148
	TRIM71	0.372552	0.0249894	1.60224
	LINC01128	0.37244	0.0206861	1.68432
	TBC1D22B	0.372235	0.0143032	1.84457
	PTPN22	0.371941	0.00609224	2.21522
	ANKLE2	0.371587	0.00519728	2.28422
	SAR1A	0.371527	0.00970071	2.0132
	AP5S1	0.371327	0.0311672	1.5063
	CD151	0.371166	0.03552	1.44953
	GOLPH3	0.371146	0.0181046	1.74221
	SLC11A2	0.370899	0.00990439	2.00417
	LOC729080	0.370052	0.0412363	1.38472
	LINC00698	0.369412	0.0129821	1.88665
	CASP10	0.369346	0.0492969	1.30718
	ETV6	0.369225	0.00561092	2.25097
	RSRC2	0.368956	0.00229333	2.63953
	YIPF2	0.368407	0.00343942	2.46352
	HPS4	0.36808	0.000743	3.12901
	BCOR	0.367784	0.0476385	1.32204
	TANK	0.367491	0.027593	1.5592
	FTH1P18	0.367446	0.0236143	1.62683
	CCSER2	0.367344	0.04934	1.3068
	MGME1	0.367342	1.53e-05	4.81531
	QSOX2	0.367295	0.0307573	1.51205
	SCAMP3	0.367049	0.00146791	2.8333
	PRDX1	0.366119	0.0226594	1.64475
	ORAI1	0.365877	0.014209	1.84744
	DPM3	0.365835	0.00450585	2.34622
	PTPLB	0.36573	0.022279	1.6521
	RAB9BP1	0.365583	0.032891	1.48292
	EGLN1	0.365298	0.0108443	1.9648
	GCSH	0.364457	0.0185703	1.73118
	NAPG	0.36373	0.00372523	2.42885
	ICA1	0.363694	0.033738	1.47188
	LINC00969	0.36235	0.0454702	1.34227
	LMBRD1	0.362297	0.00283725	2.5471
	BOLA2B	0.362192	0.043969	1.35685
	NDC1	0.361866	0.00301697	2.52043
	MEX3C	0.361667	0.0107566	1.96833
	TP53BP2	0.361375	0.0225409	1.64703
	RBM10	0.361228	0.0160713	1.79395
	SNHG15	0.361146	0.0389665	1.40931
	TMEM68	0.360513	0.00978703	2.00935
	RAB40B	0.360388	0.0443252	1.35335
	POTEI	0.360113	0.0316369	1.49981
	LINC01296	0.359894	0.0329577	1.48204
	PPP4R2	0.35968	0.0109263	1.96153
	CXorf38	0.359355	0.0311295	1.50683
	PDCD1	0.359266	0.0104129	1.98243
	STT3B	0.35896	0.00856048	2.0675
	DNAJB14	0.358778	0.00485446	2.31386
	TRPT1	0.358298	0.00314948	2.50176
	MYOM3	0.35801	0.0366827	1.43554
	LINC01301	0.357848	0.00861861	2.06456
	UBE2A	0.357639	0.0299562	1.52351
	ARL8B	0.356871	0.0298463	1.52511
	TATDN3	0.356627	0.0419364	1.37741
	SNORD21	0.356145	0.0262434	1.58098
	ZBED3	0.355573	0.0219242	1.65908
	DGKZ	0.355191	0.0432908	1.3636
	FAM60A	0.355162	0.00450974	2.34585
	ZHX1-C8orf76	0.354932	0.00736271	2.13296
	NUDCD2	0.354806	0.022702	1.64394
	PBX3	0.354347	0.00760468	2.11892
	AP4M1	0.354319	0.0261806	1.58202
	FAM156A	0.35386	0.00165858	2.78026
	LRRC57	0.353671	0.00917146	2.03756
	UAP1	0.352965	0.0286914	1.54225
	PITPNA	0.352944	0.0137871	1.86053
	ATP6V0D1	0.352929	0.0116838	1.93241
	SEC24A	0.35231	0.00761183	2.11851
	RABEPK	0.352202	0.00571518	2.24297
	TMEM14C	0.351987	0.0430532	1.36599
	KCNAB2	0.351778	0.00202581	2.6934
	MIER2	0.351302	0.0170317	1.76874
	TSG101	0.35122	0.00225916	2.64605
	IFT27	0.35064	0.0429523	1.36701
	CD160	0.350258	0.0164912	1.78275
	TESK2	0.349379	0.0136702	1.86422
	LNP1	0.349379	0.0301384	1.52088
	C16orf87	0.34936	0.00264253	2.57798
	ARL8A	0.349166	0.0120072	1.92056
	CMC2	0.348899	0.0146169	1.83515
	ARL6IP1	0.348686	0.00414272	2.38271
	GRIP1	0.348287	0.0391692	1.40706
	STX1B	0.347639	0.014596	1.83577
	NDUFAF5	0.347562	0.00695828	2.1575
	LINC01473	0.347509	0.0403299	1.39437
	IQCF5	0.347479	0.0174403	1.75845
	SLC25A25	0.347453	0.000452	3.34486
	C14orf93	0.34637	0.00898846	2.04631
	TMEM62	0.346088	0.00259131	2.58648
	ISYNA1	0.3452	0.0103538	1.9849
	PTPRJ	0.345025	0.016408	1.78494
	SV2A	0.344845	0.029235	1.5341
	NAGLU	0.344779	0.0123442	1.90854
	SORBS1	0.344584	0.0181496	1.74113
	PAIP1	0.344194	0.00892847	2.04922
	ZC3H7A	0.34418	7.93e-05	4.10073
	ZMYM5	0.343705	0.024505	1.61075
	LOC100128429	0.343428	0.0469802	1.32808
	NMUR2	0.343209	0.0091776	2.03727
	LOC101927851	0.343063	0.00969854	2.01329
	RBPMS	0.342688	0.016232	1.78963
	ADO	0.342469	0.00551868	2.25816
	AFTPH	0.342409	0.00192752	2.715
	ZNF697	0.342091	0.0480423	1.31838
	AMZ2	0.342061	0.0152625	1.81637
	SNORD104	0.342028	0.0496789	1.30383
	NFATC1	0.341884	0.0220886	1.65583
	FBXO4	0.341313	0.0244684	1.61139
	TTTY5	0.340935	0.0312773	1.50477
	CLNS1A	0.339688	0.00447915	2.3488
	PPM1G	0.339314	0.00287012	2.5421
	AIFM2	0.338804	0.0124123	1.90615
	FBXO32	0.338715	0.0190329	1.7205
	MCM5	0.338699	0.0404393	1.3932
	PLCXD1	0.338643	0.0424542	1.37208
	GLOD4	0.338538	0.00804467	2.09449
	BNIP2	0.338482	0.00278752	2.55478
	MGC27382	0.338344	0.0311244	1.5069
	TRAF3IP2	0.33761	0.0017387	2.75978
	PARP2	0.336967	0.0435389	1.36112
	LOC157273	0.336828	0.0436891	1.35963
	VEZT	0.335946	0.0176756	1.75263
	PAFAH1B1	0.335788	0.00376863	2.42382
	EMC9	0.335704	0.0446004	1.35066
	IFNAR2	0.335693	0.0119715	1.92185
	YIPF4	0.334733	0.0187744	1.72643
	TASP1	0.333946	0.00402122	2.39564
	TRAM1	0.333924	0.00835632	2.07798
	CTNNA3	0.333846	0.0170011	1.76952
	MSH5	0.333655	0.0225679	1.64651
	LOC100996263	0.33351	0.0394316	1.40416
	LINC00669	0.333049	0.0381611	1.41838
	C8orf82	0.332272	0.0156825	1.80459
	FAM210A	0.331335	0.0264453	1.57765
	SLA2	0.331254	0.00449845	2.34694
	ZNF34	0.331164	0.0338176	1.47086
	CRIP1	0.33048	0.0493728	1.30651
	FAS	0.330214	0.0056169	2.2505
	LINC00959	0.330146	0.00878717	2.05615
	PEX7	0.330124	0.0192421	1.71575
	RAB6C-AS1	0.329814	0.00907187	2.0423
	LINC00282	0.329237	0.0357812	1.44634
	MARS	0.328534	0.00379731	2.42052
	CFHR5	0.328415	0.016365	1.78608
	SEC11A	0.328341	0.0271707	1.5659
	COL11A2	0.32807	0.0157799	1.80189
	NEU1	0.327673	0.0241272	1.61749
	TNFAIP8L2	0.327594	0.0311809	1.50611
	ACTL6A	0.326926	0.0227535	1.64295
	GGA2	0.326567	0.0284926	1.54527
	LINC00608	0.325734	0.0477304	1.3212
	TCF23	0.325697	0.0139468	1.85553
	LIX1L	0.325364	0.00654202	2.18429
	LOC100507547	0.325277	0.0308527	1.51071
	TUBGCP5	0.325116	0.0359241	1.44461
	UBXN4	0.324986	0.00944839	2.02464
	MRPS31	0.324745	0.0121012	1.91717
	COQ6	0.323887	0.00617639	2.20927
	COMMD3	0.323714	0.0147038	1.83257
	OR51L1	0.323643	0.0410458	1.38673
	GALNT1	0.323447	0.0454116	1.34283
	CHUK	0.323331	0.0257803	1.58871
	SKA2	0.32315	0.0105454	1.97694
	HCG4B	0.322739	0.00977035	2.01009
	ACVR1	0.322538	0.00699663	2.15511
	RRNAD1	0.321964	0.0250408	1.60135
	ACO2	0.321605	0.000806	3.09366
	PSIP1	0.321584	0.00489386	2.31035
	LEAP2	0.32144	0.0488848	1.31083
	PCMT1	0.32135	0.0351781	1.45373
	SPATA21	0.320756	0.039372	1.40481
	CMSS1	0.320674	0.0301938	1.52008
	EPS15L1	0.320487	0.0191938	1.71684
	COBL	0.320419	0.0255813	1.59208
	BSDC1	0.320297	0.00958671	2.01833
	MLLT11	0.320014	0.027867	1.55491
	SPECC1L	0.31996	0.0443661	1.35295
	PPM1A	0.319782	0.0342947	1.46477
	IQGAP1	0.319649	0.00322305	2.49173
	GATA2-AS1	0.319334	0.0208879	1.6801
	AKIP1	0.319174	0.00278135	2.55574
	COG2	0.318835	0.00315019	2.50166
	RAB2A	0.318781	0.0196341	1.70699
	PRDM5	0.318203	0.0416696	1.38018
	NSMAF	0.317841	0.00695777	2.15753
	LOC728093	0.317553	0.0331317	1.47976
	LMOD1	0.317142	0.0133337	1.87505
	PIGT	0.317021	0.0298133	1.52559
	ATP13A5-AS1	0.316618	0.0426262	1.37032
	PVRIG	0.316522	0.0445475	1.35118
	TRMT6	0.316507	0.0127509	1.89446
	TMCC1	0.31633	0.0363087	1.43999
	MEAF6	0.3162	0.00693588	2.1589
	ATP8B5P	0.316043	0.0115943	1.93576
	LOC101929863	0.315806	0.0215573	1.66641
	PRKAB1	0.31576	0.0232709	1.63319
	LOC101929243	0.315653	0.0134323	1.87185
	SMIM4	0.315498	0.0316863	1.49913
	MEGF8	0.315336	0.0311813	1.50611
	OR7D2	0.314916	0.0335973	1.4737
	TANGO6	0.314785	0.00257428	2.58934
	HSF2BP	0.314691	0.047015	1.32776
	BAD	0.314503	0.0357994	1.44612
	MYDGF	0.313696	0.0238644	1.62225
	ITPKB	0.313426	0.0463746	1.33372
	LINC00408	0.31321	0.0127185	1.89556
	PHC2	0.313145	0.022259	1.65249
	TMPRSS7	0.312873	0.0119296	1.92338
	UTP18	0.312792	0.0151808	1.81871
	CFLAR	0.312783	0.00799914	2.09696
	PCP4L1	0.31259	0.0407958	1.38938
	RELT	0.312585	0.0144037	1.84153
	MPI	0.31244	0.00537214	2.26985
	POLR2E	0.311823	0.0230868	1.63664
	SOX2-OT	0.311437	0.0073634	2.13292
	CLK4	0.311177	0.041217	1.38492
	PIK3R2	0.310916	0.0147144	1.83226
	NHLRC4	0.310808	0.0200164	1.69861
	DDX26B	0.310713	0.0237264	1.62477
	PWP2	0.309586	0.0296535	1.52792
	PLEKHM3	0.309579	0.002228	2.65208
	NSMCE1	0.309549	0.00822793	2.08471
	ADK	0.309369	0.0113682	1.94431
	C5orf15	0.30926	0.000575	3.24033
	ZSWIM8	0.30904	0.001574	2.80299
	NCSTN	0.308876	0.0152299	1.8173
	ALDH18A1	0.308828	0.00161085	2.79294
	RBFOX2	0.30874	0.0389051	1.40999
	TSPYL2	0.308663	0.0107161	1.96996
	IFT52	0.308459	0.0425651	1.37095
	MAP2K3	0.308003	0.00364506	2.4383
	XPO5	0.307932	0.0014763	2.83083
	LOC100506014	0.307615	0.0403838	1.39379
	LY6G5C	0.307522	0.014821	1.82912
	ISCU	0.307386	0.0419692	1.37707
	AAAS	0.30706	0.000396	3.4023
	ANAPC13	0.306869	0.0295706	1.52914
	RCL1	0.306314	0.00117987	2.92817
	DDIT3	0.306283	0.0234636	1.62961
	DNAJC13	0.306265	0.0321424	1.49292
	VTA1	0.305899	0.017083	1.76744
	CD320	0.305839	0.0168046	1.77457
	MALRD1	0.305614	0.0187108	1.72791
	NUP88	0.305598	0.0329966	1.48153
	BBS1	0.305085	0.0143924	1.84187
	ERLEC1	0.304957	0.00568465	2.2453
	PGPEP1	0.304514	0.0039509	2.4033
	RNF183	0.304389	0.0108354	1.96515
	TINCR	0.304271	0.0454362	1.3426
	C16orf54	0.304227	0.0339659	1.46896
	PCDHB2	0.304164	0.0279835	1.5531
	CERS5	0.303413	0.00934072	2.02962
	LOC101929413	0.303386	0.0216627	1.66429
	ASCC1	0.303144	0.0325314	1.4877
	SUGP2	0.303115	0.0473999	1.32422
	HCG18	0.302885	0.0493324	1.30687
	TMEM194B	0.302614	0.00495094	2.30531
	LINC00454	0.302581	0.0184292	1.73449
	MRPL3	0.302447	0.0102586	1.98891
	NCK1	0.302207	0.0245366	1.61019
	FKBP1A	0.301907	0.0143202	1.84405
	LOC102724691	0.301657	0.0399447	1.39854
	HLA-B	0.301641	0.040219	1.39557
	LAMTOR3	0.301553	0.0121548	1.91525
	METTL11B	0.301444	0.0312108	1.50569
	LINC00592	0.30064	0.011819	1.92742
	TOMM34	0.30056	0.00962614	2.01655
	LOC388282	0.300516	0.0461865	1.33549
	ARMCX6	0.299884	0.0422481	1.37419
	CXorf40B	0.299845	0.010968	1.95987
	PGAP1	0.299636	0.027937	1.55382
	SSTR5	0.299607	0.0398403	1.39968
	HIAT1	0.299548	0.000154	3.81248
	TSHZ1	0.299536	0.0114236	1.9422
	CST1	0.299265	0.026491	1.5769
	ANKRD22	0.299019	0.0383904	1.41578
	EPB41L1	0.29862	0.0317189	1.49868
	TSPAN31	0.298589	0.0125561	1.90115
	FGA	0.298582	0.0227202	1.64359
	ABAT	0.298559	0.0471353	1.32665
	LTV1	0.298277	0.00657142	2.18234
	OR2H2	0.298075	0.0420859	1.37586
	HNRNPA2B1	0.297717	0.0147303	1.83179
	HSP90AB1	0.297679	0.0142061	1.84753
	NFKBIE	0.297644	0.010707	1.97033
	TAB2	0.297314	0.00467551	2.33017
	PRDX5	0.297219	0.00540718	2.26703
	MFSD6	0.297048	0.0177463	1.75089
	NCAPD3	0.296971	0.0135969	1.86656
	MRPS7	0.296963	0.0179276	1.74648
	LOC100289473	0.296511	0.0429345	1.36719
	SQRDL	0.296469	0.0152716	1.81612
	SCFD2	0.296279	0.0167477	1.77605
	CLASP2	0.296273	0.0458929	1.33825
	PCCA	0.296134	0.0482995	1.31606
	LOH12CR1	0.296023	0.0187718	1.72649
	TOLLIP	0.295654	0.0259804	1.58535
	GHRH	0.295322	0.0401472	1.39634
	LZTS2	0.295225	0.0201949	1.69476
	VPS37A	0.295131	0.0368507	1.43355
	EGFL6	0.294983	0.0311373	1.50672
	FHAD1	0.294912	0.037539	1.42552
	SLC25A21	0.294899	0.0331498	1.47952
	RABEP2	0.294374	0.0176315	1.75371
	MAP4K2	0.293478	0.0205379	1.68744
	TMEM216	0.293467	0.0149395	1.82567
	GABPB1	0.293189	0.0429749	1.36679
	NFU1	0.292945	0.0158535	1.79988
	ZNF322	0.292631	0.0345038	1.46213
	TIGD5	0.292554	0.0267184	1.57319
	CNNM4	0.29251	0.000767	3.1152
	ELP3	0.292032	0.0165963	1.77999
	DCUN1D1	0.292027	0.0124951	1.90326
	EPHA8	0.291805	0.0326107	1.48664
	SMIM23	0.291671	0.0297439	1.5266
	RB1	0.291595	0.0328254	1.48379
	KCNC2	0.291539	0.0293936	1.53175
	PRKACB	0.291528	0.0400477	1.39742
	TRIM37	0.291502	0.000909	3.04144
	ELMO1-AS1	0.291434	0.0451193	1.34564
	ADORA1	0.291406	0.0413953	1.38305
	ITGAE	0.291369	0.0443187	1.35341
	C20orf196	0.29069	0.0192805	1.71488
	TAF12	0.290566	0.0145605	1.83682
	TMEM218	0.290451	0.0314736	1.50205
	LOC100506258	0.290082	0.0315362	1.50119
	CXCL2	0.290077	0.0111257	1.95367
	ATG2A	0.289656	0.00464691	2.33284
	CDK5RAP3	0.289418	0.0450164	1.34663
	LZIC	0.289253	0.00398124	2.39998
	TRPM3	0.288859	0.0249994	1.60207
	PPP4R1	0.288688	0.00798269	2.09785
	LOC101927575	0.288552	0.0447479	1.34923
	FXN	0.288445	0.0164839	1.78294
	OR52W1	0.288017	0.0182519	1.73869
	FAM120A	0.287985	0.00435128	2.36138
	RPN2	0.287678	0.00983807	2.00709
	HRASLS5	0.287071	0.00491865	2.30815
	GPR108	0.287012	0.0192271	1.71609
	ZDHHC24	0.286971	0.0308888	1.5102
	SLC30A9	0.286305	0.0416893	1.37998
	PRR7	0.285038	0.0335441	1.47438
	KLHL7	0.284921	0.0192247	1.71614
	SFMBT1	0.284743	0.029454	1.53086
	EFCAB9	0.284695	0.0246974	1.60735
	ABCA3	0.284357	0.0494611	1.30574
	TIAM1	0.284246	0.0114148	1.94253
	GOLGA6A	0.284118	0.0371258	1.43032
	RPS6KB1	0.284104	0.0213309	1.67099
	SPTSSA	0.284069	0.0268519	1.57102
	MDM2	0.283972	0.0212998	1.67163
	TOMM20	0.283875	0.0181619	1.74084
	DCTD	0.283866	0.00455534	2.34148
	YARS	0.283845	0.0255861	1.592
	LYPD6B	0.283818	0.0401419	1.3964
	PTOV1	0.283692	0.0473626	1.32456
	CALU	0.283582	0.0163195	1.78729
	PPFIA1	0.283562	0.0132329	1.87834
	C1orf43	0.283371	0.00473035	2.32511
	NFE2L1	0.283326	0.0119441	1.92285
	RAD21	0.28307	0.0221791	1.65406
	NDUFAF3	0.282964	0.030583	1.51452
	PAXIP1-AS2	0.282667	0.00873397	2.05879
	WDR49	0.282592	0.0208607	1.68067
	FENDRR	0.282389	0.0339062	1.46972
	ZC3H11A	0.281962	0.0432778	1.36373
	FAM117A	0.281721	0.0465134	1.33242
	RAB3GAP2	0.281715	0.0148637	1.82787
	PTBP2	0.281517	0.0182427	1.73891
	LOC101930316	0.281415	0.0254284	1.59468
	NOP14	0.281404	0.01086	1.96417
	PSMD14	0.281248	0.0289017	1.53908
	OR10A2	0.281148	0.0198423	1.70241
	WBP11	0.281103	0.00692149	2.1598
	ELAVL1	0.281011	0.00999615	2.00017
	NDUFA7	0.280701	0.00939354	2.02717
	MT1DP	0.280506	0.0178352	1.74872
	FBXO8	0.280494	0.0115198	1.93855
	STK26	0.280315	0.0473812	1.32439
	DPP8	0.280154	0.0378848	1.42153
	SELT	0.280088	0.0455287	1.34171
	BOD1L2	0.279929	0.0264458	1.57764
	WDR26	0.279909	0.00524174	2.28052
	RGS19	0.279581	0.013111	1.88236
	GYPA	0.279575	0.0141882	1.84807
	PPP6C	0.279434	0.0105918	1.97503
	CASP3	0.279339	0.013288	1.87654
	HDHD2	0.279141	0.0448438	1.3483
	SP4	0.279122	0.0119196	1.92374
	DECR1	0.27896	0.0129427	1.88797
	PEX14	0.278914	0.00154128	2.81212
	RASAL2	0.278839	0.0370515	1.43119
	PAM16	0.278756	0.00439545	2.357
	DHDDS	0.278673	0.00507944	2.29418
	ADCY7	0.278623	0.0414322	1.38266
	PTDSS2	0.278587	0.0179495	1.74595
	ARL2	0.278549	0.0168897	1.77238
	WWC2-AS2	0.27821	0.0216959	1.66362
	NR1H3	0.278042	0.0137332	1.86223
	C11orf31	0.277802	0.0302414	1.5194
	PRCP	0.277639	0.0188519	1.72464
	PCID2	0.277636	0.02887	1.53955
	CSNK1G2	0.277595	0.000169	3.77211
	BPGM	0.277537	0.00927762	2.03256
	INPPL1	0.277484	0.0181996	1.73994
	PSMB6	0.277066	0.0458931	1.33825
	VARS	0.277045	0.0198384	1.70249
	CFAP74	0.276703	0.0348794	1.45743
	HOXD4	0.276492	0.0291165	1.53586
	DCLK2	0.276342	0.0289551	1.53827
	LINC01271	0.276218	0.0363594	1.43938
	LOC102724970	0.276066	0.0405758	1.39173
	LINC00963	0.275858	0.0375017	1.42595
	RMDN3	0.275549	0.0137858	1.86057
	HMGCS1	0.275523	0.0149222	1.82617
	H2AFY	0.275384	0.00968287	2.014
	TPGS1	0.275082	0.0427421	1.36914
	WBP4	0.27439	0.0264728	1.5772
	CEP85L	0.274389	0.0240269	1.6193
	HSPA9	0.274254	0.013195	1.87959
	MTMR2	0.274236	0.0114368	1.9417
	GATAD1	0.274131	0.000922	3.03527
	SP140	0.27408	0.0225337	1.64717
	SNORD18C	0.273651	0.0274149	1.56201
	POLR2K	0.273213	0.0414044	1.38295
	MTA1	0.272643	0.0135105	1.86933
	CAAP1	0.272513	0.00486312	2.31308
	SDE2	0.272431	0.0297961	1.52584
	VDAC2	0.272306	0.0106072	1.9744
	FARS2	0.272299	0.00319777	2.49515
	LOC102724452	0.272161	0.0165319	1.78168
	YLPM1	0.271514	0.0248223	1.60516
	ZNF793	0.271286	0.0105265	1.97772
	SMARCA4	0.27127	0.0185302	1.73212
	THAP3	0.271218	0.0159053	1.79846
	TRIM13	0.270967	0.0132643	1.87731
	PLCXD2-AS1	0.270873	0.0292881	1.53331
	PCLO	0.270844	0.0146612	1.83383
	ARSA	0.270722	0.0140948	1.85094
	HK1	0.270569	0.00698013	2.15614
	KLF15	0.270555	0.0262249	1.58129
	ASPSCR1	0.27003	0.0185357	1.73199
	C6orf89	0.269768	0.0016328	2.78707
	FAM205BP	0.269625	0.0259948	1.58511
	ENTPD4	0.269507	0.019628	1.70712
	PUM1	0.269341	0.0217896	1.66175
	VN1R10P	0.268758	0.0409486	1.38776
	OR1L4	0.26826	0.0247264	1.60684
	TEAD2	0.26821	0.0159216	1.79801
	ZNF207	0.267857	0.0091558	2.0383
	NIN	0.267292	0.0229955	1.63836
	HAUS7	0.267083	0.0201622	1.69546
	KPNA2	0.26704	0.0014668	2.83363
	HEPN1	0.266516	0.0235416	1.62816
	MRPL4	0.266413	0.0310822	1.50749
	SLC35E3	0.266202	0.000176	3.75449
	PYCR2	0.265897	0.00494206	2.30609
	TMX2	0.265623	0.0273557	1.56295
	TRAF2	0.265484	0.0255473	1.59266
	ATF7	0.265204	0.0368633	1.43341
	C8B	0.265085	0.0379289	1.42103
	PPP6R3	0.264933	0.00455854	2.34117
	CUEDC2	0.264766	0.0462714	1.33469
	L3MBTL4	0.264666	0.0326644	1.48593
	GAS6-AS1	0.264314	0.029167	1.53511
	SHFM1	0.264216	0.0292519	1.53385
	EPOR	0.26413	0.0242175	1.61587
	SGSM2	0.264032	0.0253184	1.59656
	LOC101928551	0.264001	0.0419094	1.37769
	ANAPC7	0.263955	0.00412729	2.38434
	RBBP8NL	0.263765	0.0338305	1.47069
	PSMD12	0.263339	0.0369846	1.43198
	LINC00890	0.263335	0.0496694	1.30391
	STAG1	0.2633	0.0241123	1.61776
	MKRN1	0.263217	0.0104078	1.98264
	UROD	0.263043	0.0422659	1.37401
	ATP6AP1	0.262887	0.0412935	1.38412
	CXorf23	0.262756	0.0212979	1.67166
	PEX19	0.262566	0.00193718	2.71283
	SNRNP70	0.262424	0.0181161	1.74193
	WFDC2	0.262187	0.0323504	1.49012
	IFT74	0.262148	0.0378073	1.42242
	NDUFB3	0.262096	0.0207879	1.68219
	MBD6	0.261862	0.0425944	1.37065
	GBAP1	0.26155	0.00072	3.14267
	MAP3K2	0.261264	0.00691	2.16052
	P4HB	0.260811	0.0269225	1.56988
	TMEM104	0.260806	0.028404	1.54662
	PPP2CA	0.260709	0.0170049	1.76942
	PAF1	0.260569	0.00479622	2.3191
	GBAS	0.260506	0.0050393	2.29763
	ACSS1	0.260486	0.0091922	2.03658
	CDKN2AIPNL	0.259979	0.0380942	1.41914
	SMPD4	0.2598	0.0167756	1.77532
	LOC100128317	0.259577	0.0141125	1.8504
	LINC01537	0.259475	0.0348282	1.45807
	LINC00445	0.259465	0.0272358	1.56486
	TMEM25	0.259146	0.0490981	1.30894
	KIF2A	0.259125	0.0279476	1.55366
	MKL1	0.258922	0.0336864	1.47255
	LOC100132661	0.25883	0.0308048	1.51138
	LOC100506725	0.258588	0.0183788	1.73568
	ETFA	0.258448	0.0294601	1.53077
	TMEM51-AS1	0.258416	0.0430701	1.36582
	STT3A	0.258073	0.0183946	1.73531
	MPC1	0.257664	0.0138282	1.85923
	PEF1	0.257663	0.0350579	1.45521
	LOC441455	0.257457	0.0124824	1.9037
	ATP6V0B	0.25722	0.0430013	1.36652
	IFFO1	0.257206	0.0414158	1.38283
	SIRPG	0.257081	0.0307114	1.5127
	LOC284454	0.25663	0.0455577	1.34144
	RPS6KB2	0.256289	0.0309098	1.5099
	WDR83	0.256274	0.032679	1.48573
	TIMM50	0.256057	0.0217188	1.66316
	TRAFD1	0.255832	0.0166973	1.77735
	PCCB	0.255723	0.0485276	1.31401
	C16orf70	0.255557	0.0424019	1.37261
	RABGAP1	0.255243	0.00540969	2.26683
	STK24	0.2552	0.00986359	2.00596
	SENP3	0.255016	0.0390602	1.40827
	CDC23	0.254971	0.0351754	1.45376
	UBL3	0.254544	0.0197954	1.70344
	ELAC2	0.25419	0.0194219	1.71171
	ZNF326	0.254172	0.00244645	2.61146
	ACBD6	0.253478	0.0169757	1.77017
	FBXW9	0.253211	0.032374	1.4898
	HARS	0.252803	0.00537826	2.26936
	NEK3	0.252396	0.0268355	1.57129
	OR4Q3	0.252392	0.0347181	1.45944
	CCT7	0.252027	0.007855	2.10485
	LOC102723759	0.251964	0.0352118	1.45331
	AGO1	0.251887	0.0146662	1.83368
	LINC00842	0.251339	0.0297842	1.52601
	DCAF7	0.251147	0.0300472	1.5222
	TMEM208	0.251132	0.018856	1.72455
	LINC00998	0.250916	0.0212678	1.67228
	ADSS	0.250575	0.00160564	2.79435
	CPED1	0.250458	0.0321513	1.4928
	ALYREF	0.250391	0.0128253	1.89193
	NACC1	0.250257	0.0350911	1.4548
	KEAP1	0.250231	0.0174614	1.75792
	NEDD1	0.249525	0.00779671	2.10809
	FOXK2	0.249104	0.018134	1.74151
	SNORD113-8	0.249032	0.0369717	1.43213
	DSCR9	0.248942	0.0498241	1.30256
	PEX26	0.24877	0.0271495	1.56624
	KDM2B	0.248665	0.0265157	1.5765
	TERF2IP	0.248538	0.00271141	2.56681
	CDC34	0.248064	0.00861051	2.06497
	C9orf64	0.247759	0.020582	1.68651
	TIMP3	0.24768	0.0456972	1.34011
	GTF2A2	0.24758	0.0118712	1.92551
	LIMK1	0.247485	0.0312753	1.5048
	GRM6	0.247286	0.0474249	1.32399
	APOBEC3D	0.247072	0.0485169	1.31411
	PPP2R5B	0.247058	0.0316439	1.49971
	CTPS1	0.24702	0.0489182	1.31053
	C20orf203	0.24692	0.0354725	1.45011
	SLC6A1-AS1	0.246707	0.0357876	1.44627
	LRRC74B	0.246698	0.0400092	1.39784
	ERCC8	0.246498	0.0139889	1.85422
	SNX19	0.246295	0.0111371	1.95323
	UCP1	0.245989	0.0295061	1.53009
	OR1C1	0.245874	0.0482408	1.31659
	PTPLAD1	0.245827	0.0305628	1.51481
	CCDC90B	0.245727	0.0136973	1.86336
	ST8SIA1	0.245437	0.0289988	1.53762
	VWA3A	0.245208	0.0405408	1.39211
	CUL4B	0.245063	0.0180858	1.74266
	PIDD1	0.244946	0.0237853	1.62369
	MED7	0.244734	0.0221786	1.65407
	LINC00113	0.244672	0.0495724	1.30476
	LOC102724406	0.244284	0.0352798	1.45247
	UBE2Z	0.243952	0.0211745	1.67419
	OR8B2	0.243904	0.034191	1.46609
	PI4K2A	0.243881	0.0251535	1.5994
	MAPK9	0.243583	0.0213721	1.67015
	MTX2	0.243368	0.0288322	1.54012
	FBXO3	0.242998	0.0429992	1.36654
	STX5	0.242515	0.0309386	1.5095
	PYHIN1	0.242494	0.0303493	1.51785
	PACSIN2	0.241969	0.0190366	1.72041
	PITPNB	0.241917	0.0293029	1.53309
	SLC30A5	0.241632	0.0313281	1.50407
	NAA25	0.241602	0.0176557	1.75311
	ZFP91	0.241188	0.0346339	1.4605
	TSPO	0.241071	0.0423646	1.373
	TNFRSF10D	0.241017	0.0347798	1.45867
	PDE1A	0.240918	0.0414419	1.38256
	TOMM6	0.240757	0.0359974	1.44373
	PLXNA2	0.240664	0.0491111	1.30882
	USO1	0.240214	0.00969584	2.01341
	SH3BGRL	0.239945	0.0339247	1.46948
	DCX	0.23993	0.043079	1.36573
	RNF5	0.239483	0.0496069	1.30446
	C7orf26	0.239471	0.0323315	1.49037
	LINC01197	0.239179	0.0377683	1.42287
	GABRQ	0.239031	0.041697	1.37989
	CNPY3	0.238293	0.00673858	2.17143
	RAD21L1	0.238233	0.0459448	1.33776
	ZNF362	0.238099	0.0393491	1.40506
	GORASP2	0.238005	0.0132126	1.87901
	MPHOSPH9	0.237958	0.0431298	1.36522
	UBAC1	0.237887	0.0125034	1.90297
	UBA2	0.237694	0.0138173	1.85958
	LOC101929657	0.237439	0.0380222	1.41996
	CREB3	0.237318	0.0362595	1.44058
	PTK2B	0.237222	0.0379492	1.4208
	SYN3	0.23718	0.0419085	1.3777
	RHOBTB3	0.236787	0.0425976	1.37061
	METTL25	0.236717	0.0168009	1.77467
	NAV2-AS5	0.236707	0.0333417	1.47701
	NDUFA11	0.236521	0.0412263	1.38483
	KIF3B	0.236411	0.0354668	1.45018
	SMARCC1	0.23641	0.00363678	2.43928
	RALBP1	0.236135	0.0112631	1.94834
	EXOSC8	0.236114	0.0409307	1.38795
	NSUN2	0.236033	0.0300536	1.5221
	TMEM179B	0.235979	0.0114766	1.94019
	ZXDC	0.235764	0.0400457	1.39744
	CCNL2	0.235724	0.0108379	1.96506
	MOB2	0.235674	0.027537	1.56008
	PGM3	0.235553	0.010768	1.96787
	PRY2	0.235304	0.0404646	1.39292
	TRIM26	0.23529	0.00178001	2.74958
	ARID5B	0.234987	0.0324411	1.4889
	FOXN3	0.23478	0.0305496	1.51499
	RELN	0.234692	0.0434736	1.36177
	SRFBP1	0.234673	0.032864	1.48328
	KIAA0020	0.23456	0.00797202	2.09843
	DPH7	0.234345	0.0141612	1.8489
	CCT2	0.234268	0.0359795	1.44394
	HADHB	0.234174	0.0278053	1.55587
	COX17	0.234141	0.043925	1.35729
	TDRD7	0.234037	0.021606	1.66543
	IL17C	0.234035	0.0427237	1.36933
	AP2M1	0.233966	0.0416395	1.38049
	ANXA11	0.233916	0.0474033	1.32419
	RNF214	0.233684	0.0258109	1.5882
	CAPN1	0.233666	0.0497966	1.3028
	TMEM165	0.233636	0.0283336	1.5477
	LOC101927884	0.233327	0.0427226	1.36934
	LOC401490	0.233278	0.0487301	1.3122
	LURAP1L	0.233083	0.049256	1.30754
	THSD4-AS1	0.232893	0.0495245	1.30518
	ATP5J	0.232881	0.0318706	1.49661
	TMEM187	0.232783	0.043094	1.36558
	RARA	0.23273	0.0448635	1.34811
	ZBBX	0.232578	0.049277	1.30736
	NUS1	0.232457	0.0397249	1.40094
	SNX14	0.232358	0.00287417	2.54149
	SNORA76A	0.232304	0.0483681	1.31544
	GLG1	0.23223	0.0394995	1.40341
	GPR137	0.23197	0.0425393	1.37121
	PRPF31	0.231414	0.014465	1.83968
	NECAP2	0.231338	0.019942	1.70023
	LINC00461	0.231292	0.0345513	1.46154
	ACLY	0.231001	0.00530547	2.27528
	ARHGEF1	0.230756	0.0315941	1.50039
	MFN2	0.229512	0.0478421	1.32019
	ARID4B	0.229368	0.0229132	1.63991
	UHRF2	0.228249	0.0140962	1.8509
	OR11H12	0.22823	0.0462337	1.33504
	ATP6V0C	0.228208	0.00765995	2.11577
	MCPH1	0.228194	0.00137574	2.86146
	NDUFS8	0.228075	0.0281478	1.55056
	LINC01531	0.227807	0.0410962	1.3862
	GPN2	0.227793	0.00963961	2.01594
	FOXI2	0.227591	0.00337615	2.47158
	ARMC6	0.227557	0.0455899	1.34113
	EFTUD2	0.22748	0.0115407	1.93777
	UBE2J2	0.226927	0.000955	3.02
	NSF	0.226695	0.00377651	2.42291
	CTSD	0.226334	0.0141593	1.84896
	GUSB	0.225991	0.0397357	1.40082
	SERPINA11	0.225751	0.0491857	1.30816
	ALDH6A1	0.225112	0.0269418	1.56957
	SACM1L	0.224959	0.0458803	1.33837
	RBBP7	0.224726	0.0383545	1.41618
	DHX37	0.224337	0.0228752	1.64063
	TATDN2	0.223056	0.00114044	2.94293
	TVP23C	0.22275	0.0099679	2.0014
	KCTD20	0.22267	0.0267533	1.57262
	UBE2S	0.222567	0.0190705	1.71964
	MCM9	0.222452	0.00301631	2.52052
	PDHX	0.222064	0.00213832	2.66993
	COPS2	0.221825	0.00667452	2.17558
	LRRC56	0.22171	0.028153	1.55048
	MEA1	0.221674	0.014863	1.82789
	COG3	0.221616	0.0174172	1.75902
	HACL1	0.221607	0.0231256	1.63591
	SCLT1	0.221518	0.0115064	1.93906
	AZIN1	0.221504	0.0188021	1.72579
	EMC2	0.221365	0.0123937	1.9068
	MED30	0.221231	0.0170206	1.76902
	NDUFS1	0.22108	0.00238914	2.62176
	SMG6	0.221047	0.00562016	2.25025
	WSB1	0.220859	0.0195725	1.70835
	GALNTL6	0.220741	0.0471993	1.32606
	ALS2	0.220713	0.0233808	1.63114
	C17orf59	0.220316	0.0367559	1.43467
	LRRC28	0.220223	0.0479904	1.31885
	R3HDM1	0.219746	0.0377015	1.42364
	MTERF3	0.219624	0.0378511	1.42192
	PCBP2	0.219608	0.049893	1.30196
	SNX17	0.219528	0.0141886	1.84806
	PHF10	0.219379	0.0475211	1.32311
	GDI2	0.219274	0.00440392	2.35616
	GSK3A	0.219202	0.00738113	2.13188
	LANCL1	0.218641	0.0175702	1.75522
	AZI2	0.218583	0.0175533	1.75564
	RFC4	0.218245	0.0381283	1.41875
	EXOC7	0.218232	0.0110987	1.95473
	SLC39A1	0.21795	0.0402958	1.39474
	H2AFV	0.217565	0.038918	1.40985
	ZBTB4	0.217139	0.046684	1.33083
	B3GNT6	0.216891	0.0444631	1.352
	ARMCX3	0.216605	0.0399601	1.39837
	ST3GAL3	0.216391	0.0151412	1.81984
	RBM18	0.216	0.0224164	1.64944
	TMEM258	0.215968	0.00887333	2.05191
	FAM210B	0.215952	0.0180115	1.74445
	ATP5J2	0.215436	0.0476974	1.32151
	TTC21B	0.215397	0.0159252	1.79792
	NME3	0.214784	0.0108636	1.96403
	CYTH1	0.214416	0.0446963	1.34973
	SON	0.214215	0.0417471	1.37937
	ARF4	0.213621	0.0215705	1.66614
	FKBP3	0.213421	0.0160553	1.79438
	HSPD1	0.213243	0.012567	1.90077
	GCFC2	0.21319	0.0175367	1.75605
	COX8A	0.21288	0.0408544	1.38876
	RNMTL1	0.212712	0.000639	3.1945
	SRP68	0.212606	0.0111268	1.95363
	YWHAG	0.21246	0.0263355	1.57946
	CRKL	0.212332	0.00439842	2.3567
	PSENEN	0.212266	0.0261337	1.5828
	DDB2	0.21224	0.0258163	1.58811
[truncated: 2,156 more rows]
